# Supplementary material for: TP53 Status, Patient Sex, and the Immune Response as Determinants of Lung Cancer Patient Survival
Source: Cancers (Basel). 2020 Jun 11;12(6):1535. doi: 10.3390/cancers12061535 (PMC7352604; doi:10.3390/cancers12061535)
Supplement: Supplementary file 1 [file cancers-12-01535-s001.zip › Supplementary tables.csv]

## Sheet: Table S1
Table S1: Tumor purity estimates for TCGA samples
Sample ID	Cancer type	CPE
TCGA-05-4244-01A	LUAD	0.7019
TCGA-05-4245-01A	LUAD	NaN
TCGA-05-4249-01A	LUAD	0.64
TCGA-05-4250-01A	LUAD	0.637
TCGA-05-4382-01A	LUAD	0.381
TCGA-05-4384-01A	LUAD	0.6937
TCGA-05-4389-01A	LUAD	0.6365
TCGA-05-4390-01A	LUAD	0.7245
TCGA-05-4395-01A	LUAD	0.7424
TCGA-05-4396-01A	LUAD	0.8575
TCGA-05-4397-01A	LUAD	0.7943
TCGA-05-4398-01A	LUAD	0.5172
TCGA-05-4402-01A	LUAD	0.6367
TCGA-05-4403-01A	LUAD	0.5991
TCGA-05-4405-01A	LUAD	0.592
TCGA-05-4410-01A	LUAD	0.5286
TCGA-05-4415-01A	LUAD	0.8018
TCGA-05-4417-01A	LUAD	0.5416
TCGA-05-4418-01A	LUAD	0.656
TCGA-05-4420-01A	LUAD	0.7413
TCGA-05-4422-01A	LUAD	0.7019
TCGA-05-4424-01A	LUAD	0.5353
TCGA-05-4425-01A	LUAD	0.6944
TCGA-05-4426-01A	LUAD	0.8361
TCGA-05-4427-01A	LUAD	0.6325
TCGA-05-4430-01A	LUAD	0.4406
TCGA-05-4432-01A	LUAD	0.6573
TCGA-05-4433-01A	LUAD	0.6843
TCGA-05-4434-01A	LUAD	0.4379
TCGA-05-5420-01A	LUAD	0.3563
TCGA-05-5423-01A	LUAD	0.645
TCGA-05-5425-01A	LUAD	0.523
TCGA-05-5428-01A	LUAD	0.7199
TCGA-05-5429-01A	LUAD	0.7911
TCGA-05-5715-01A	LUAD	0.6809
TCGA-35-3615-01A	LUAD	0.7943
TCGA-35-3621-01A	LUAD	NaN
TCGA-35-4122-01A	LUAD	0.3716
TCGA-35-4123-01A	LUAD	0.5422
TCGA-35-5375-01A	LUAD	0.7519
TCGA-38-4625-01A	LUAD	0.6678
TCGA-38-4626-01A	LUAD	0.3526
TCGA-38-4627-01A	LUAD	0.4862
TCGA-38-4628-01A	LUAD	0.637
TCGA-38-4629-01A	LUAD	0.4569
TCGA-38-4630-01A	LUAD	0.8498
TCGA-38-4631-01A	LUAD	0.7072
TCGA-38-4632-01A	LUAD	0.5602
TCGA-38-6178-01A	LUAD	0.6553
TCGA-38-7271-01A	LUAD	0.3431
TCGA-38-A44F-01A	LUAD	0.554
TCGA-44-2655-01A	LUAD	0.5834
TCGA-44-2656-01A	LUAD	0.4861
TCGA-44-2656-01B	LUAD	0.4888
TCGA-44-2657-01A	LUAD	0.4853
TCGA-44-2659-01A	LUAD	0.5517
TCGA-44-2661-01A	LUAD	0.4379
TCGA-44-2662-01A	LUAD	0.4072
TCGA-44-2662-01B	LUAD	NaN
TCGA-44-2664-01A	LUAD	NaN
TCGA-44-2665-01A	LUAD	0.5896
TCGA-44-2665-01B	LUAD	0.6369
TCGA-44-2666-01A	LUAD	0.791
TCGA-44-2666-01B	LUAD	0.7523
TCGA-44-2668-01A	LUAD	0.4297
TCGA-44-2668-01B	LUAD	0.4944
TCGA-44-3396-01A	LUAD	0.4
TCGA-44-3398-01A	LUAD	0.3905
TCGA-44-3917-01A	LUAD	0.4892
TCGA-44-3917-01B	LUAD	0.6114
TCGA-44-3918-01A	LUAD	0.4777
TCGA-44-3918-01B	LUAD	0.5509
TCGA-44-3919-01A	LUAD	0.656
TCGA-44-4112-01A	LUAD	0.6708
TCGA-44-4112-01B	LUAD	0.6597
TCGA-44-5643-01A	LUAD	0.6533
TCGA-44-5644-01A	LUAD	0.8198
TCGA-44-5645-01A	LUAD	0.7167
TCGA-44-5645-01B	LUAD	0.6645
TCGA-44-6144-01A	LUAD	0.5977
TCGA-44-6145-01A	LUAD	0.4508
TCGA-44-6146-01A	LUAD	0.9
TCGA-44-6146-01B	LUAD	0.711
TCGA-44-6147-01A	LUAD	0.7875
TCGA-44-6147-01B	LUAD	0.4452
TCGA-44-6148-01A	LUAD	0.7473
TCGA-44-6774-01A	LUAD	0.5043
TCGA-44-6775-01A	LUAD	0.7367
TCGA-44-6775-01C	LUAD	0.6337
TCGA-44-6776-01A	LUAD	0.8193
TCGA-44-6777-01A	LUAD	0.5186
TCGA-44-6778-01A	LUAD	0.4164
TCGA-44-6779-01A	LUAD	0.5646
TCGA-44-7659-01A	LUAD	0.74
TCGA-44-7660-01A	LUAD	0.8281
TCGA-44-7661-01A	LUAD	0.4876
TCGA-44-7662-01A	LUAD	0.4761
TCGA-44-7667-01A	LUAD	0.6368
TCGA-44-7669-01A	LUAD	0.637
TCGA-44-7670-01A	LUAD	0.7263
TCGA-44-7671-01A	LUAD	0.7982
TCGA-44-7672-01A	LUAD	0.4187
TCGA-44-8117-01A	LUAD	0.7326
TCGA-44-8119-01A	LUAD	0.5584
TCGA-44-8120-01A	LUAD	0.6556
TCGA-44-A479-01A	LUAD	0.3824
TCGA-44-A47A-01A	LUAD	0.6494
TCGA-44-A47B-01A	LUAD	0.6985
TCGA-44-A47F-01A	LUAD	0.7779
TCGA-44-A47G-01A	LUAD	0.3734
TCGA-44-A4SS-01A	LUAD	0.4406
TCGA-44-A4SU-01A	LUAD	0.6701
TCGA-49-4486-01A	LUAD	0.8456
TCGA-49-4487-01A	LUAD	0.4429
TCGA-49-4488-01A	LUAD	0.6937
TCGA-49-4490-01A	LUAD	0.6257
TCGA-49-4494-01A	LUAD	0.7019
TCGA-49-4501-01A	LUAD	0.5801
TCGA-49-4505-01A	LUAD	0.5801
TCGA-49-4506-01A	LUAD	0.6515
TCGA-49-4507-01A	LUAD	0.616
TCGA-49-4510-01A	LUAD	0.7697
TCGA-49-4512-01A	LUAD	0.669
TCGA-49-4514-01A	LUAD	0.6207
TCGA-49-6742-01A	LUAD	0.7352
TCGA-49-6743-01A	LUAD	0.5671
TCGA-49-6744-01A	LUAD	0.4123
TCGA-49-6745-01A	LUAD	0.5477
TCGA-49-6761-01A	LUAD	0.6033
TCGA-49-6767-01A	LUAD	0.614
TCGA-49-AAQV-01A	LUAD	0.5552
TCGA-49-AAR0-01A	LUAD	0.6344
TCGA-49-AAR2-01A	LUAD	0.5942
TCGA-49-AAR3-01A	LUAD	0.5929
TCGA-49-AAR4-01A	LUAD	0.5243
TCGA-49-AAR9-01A	LUAD	0.7622
TCGA-49-AARE-01A	LUAD	0.7406
TCGA-49-AARN-01A	LUAD	0.7562
TCGA-49-AARO-01A	LUAD	0.5745
TCGA-49-AARQ-01A	LUAD	0.8225
TCGA-49-AARR-01A	LUAD	0.6664
TCGA-4B-A93V-01A	LUAD	0.6573
TCGA-50-5044-01A	LUAD	0.5726
TCGA-50-5045-01A	LUAD	0.4327
TCGA-50-5049-01A	LUAD	0.44
TCGA-50-5051-01A	LUAD	0.7233
TCGA-50-5055-01A	LUAD	0.2992
TCGA-50-5066-01A	LUAD	0.4019
TCGA-50-5066-02A	LUAD	NaN
TCGA-50-5068-01A	LUAD	0.4018
TCGA-50-5072-01A	LUAD	0.6525
TCGA-50-5930-01A	LUAD	0.5508
TCGA-50-5931-01A	LUAD	0.8271
TCGA-50-5932-01A	LUAD	0.8322
TCGA-50-5933-01A	LUAD	0.4379
TCGA-50-5935-01A	LUAD	0.7367
TCGA-50-5936-01A	LUAD	0.6819
TCGA-50-5939-01A	LUAD	0.5016
TCGA-50-5941-01A	LUAD	0.381
TCGA-50-5942-01A	LUAD	0.7653
TCGA-50-5944-01A	LUAD	0.7034
TCGA-50-5946-01A	LUAD	0.7409
TCGA-50-5946-02A	LUAD	NaN
TCGA-50-6590-01A	LUAD	0.4514
TCGA-50-6591-01A	LUAD	0.895
TCGA-50-6592-01A	LUAD	0.4683
TCGA-50-6593-01A	LUAD	0.5698
TCGA-50-6594-01A	LUAD	0.7413
TCGA-50-6595-01A	LUAD	0.4503
TCGA-50-6597-01A	LUAD	0.6542
TCGA-50-6673-01A	LUAD	0.6361
TCGA-50-7109-01A	LUAD	0.64
TCGA-50-8457-01A	LUAD	0.5992
TCGA-50-8459-01A	LUAD	0.5505
TCGA-50-8460-01A	LUAD	0.5551
TCGA-53-7624-01A	LUAD	0.8436
TCGA-53-7626-01A	LUAD	0.5549
TCGA-53-7813-01A	LUAD	0.5043
TCGA-53-A4EZ-01A	LUAD	0.7135
TCGA-55-1592-01A	LUAD	0.6978
TCGA-55-1594-01A	LUAD	0.6844
TCGA-55-1595-01A	LUAD	0.5594
TCGA-55-1596-01A	LUAD	0.7913
TCGA-55-5899-01A	LUAD	0.7421
TCGA-55-6543-01A	LUAD	0.7295
TCGA-55-6642-01A	LUAD	0.5125
TCGA-55-6712-01A	LUAD	0.4532
TCGA-55-6968-01A	LUAD	0.6713
TCGA-55-6969-01A	LUAD	0.4475
TCGA-55-6970-01A	LUAD	0.6653
TCGA-55-6971-01A	LUAD	0.381
TCGA-55-6972-01A	LUAD	0.9048
TCGA-55-6975-01A	LUAD	0.5991
TCGA-55-6978-01A	LUAD	0.4128
TCGA-55-6979-01A	LUAD	0.3431
TCGA-55-6980-01A	LUAD	0.4959
TCGA-55-6981-01A	LUAD	0.5575
TCGA-55-6982-01A	LUAD	0.5638
TCGA-55-6983-01A	LUAD	0.5446
TCGA-55-6984-01A	LUAD	0.7928
TCGA-55-6985-01A	LUAD	0.5233
TCGA-55-6986-01A	LUAD	0.6777
TCGA-55-6987-01A	LUAD	0.3147
TCGA-55-7227-01A	LUAD	0.6584
TCGA-55-7281-01A	LUAD	0.5588
TCGA-55-7283-01A	LUAD	0.7103
TCGA-55-7284-01B	LUAD	0.6025
TCGA-55-7570-01A	LUAD	0.7034
TCGA-55-7573-01A	LUAD	0.6328
TCGA-55-7574-01A	LUAD	0.3431
TCGA-55-7576-01A	LUAD	0.6489
TCGA-55-7724-01A	LUAD	0.5022
TCGA-55-7725-01A	LUAD	0.6887
TCGA-55-7726-01A	LUAD	0.5615
TCGA-55-7727-01A	LUAD	0.6357
TCGA-55-7728-01A	LUAD	0.539
TCGA-55-7815-01A	LUAD	0.4681
TCGA-55-7816-01A	LUAD	0.5679
TCGA-55-7903-01A	LUAD	0.7098
TCGA-55-7907-01A	LUAD	0.5498
TCGA-55-7910-01A	LUAD	0.7195
TCGA-55-7911-01A	LUAD	0.5588
TCGA-55-7913-01B	LUAD	0.5537
TCGA-55-7914-01A	LUAD	0.6939
TCGA-55-7994-01A	LUAD	0.6245
TCGA-55-7995-01A	LUAD	0.5924
TCGA-55-8085-01A	LUAD	0.6248
TCGA-55-8087-01A	LUAD	0.8572
TCGA-55-8089-01A	LUAD	0.3411
TCGA-55-8090-01A	LUAD	0.7223
TCGA-55-8091-01A	LUAD	0.6776
TCGA-55-8092-01A	LUAD	0.5233
TCGA-55-8094-01A	LUAD	0.8439
TCGA-55-8096-01A	LUAD	0.4737
TCGA-55-8097-01A	LUAD	0.7493
TCGA-55-8203-01A	LUAD	0.5405
TCGA-55-8204-01A	LUAD	0.5852
TCGA-55-8205-01A	LUAD	0.381
TCGA-55-8206-01A	LUAD	0.5991
TCGA-55-8207-01A	LUAD	0.7034
TCGA-55-8208-01A	LUAD	0.3242
TCGA-55-8299-01A	LUAD	0.4137
TCGA-55-8301-01A	LUAD	0.381
TCGA-55-8302-01A	LUAD	0.6573
TCGA-55-8505-01A	LUAD	0.6573
TCGA-55-8506-01A	LUAD	0.6661
TCGA-55-8507-01A	LUAD	0.7466
TCGA-55-8508-01A	LUAD	0.6026
TCGA-55-8510-01A	LUAD	0.5577
TCGA-55-8511-01A	LUAD	0.4895
TCGA-55-8512-01A	LUAD	0.7711
TCGA-55-8513-01A	LUAD	0.5425
TCGA-55-8514-01A	LUAD	0.6573
TCGA-55-8614-01A	LUAD	0.7081
TCGA-55-8615-01A	LUAD	0.7303
TCGA-55-8616-01A	LUAD	0.7852
TCGA-55-8619-01A	LUAD	0.4228
TCGA-55-8620-01A	LUAD	0.7038
TCGA-55-8621-01A	LUAD	0.5738
TCGA-55-A48X-01A	LUAD	0.5617
TCGA-55-A48Y-01A	LUAD	0.6527
TCGA-55-A48Z-01A	LUAD	0.6648
TCGA-55-A490-01A	LUAD	0.6244
TCGA-55-A491-01A	LUAD	0.6043
TCGA-55-A492-01A	LUAD	0.8321
TCGA-55-A493-01A	LUAD	0.546
TCGA-55-A494-01A	LUAD	0.9135
TCGA-55-A4DF-01A	LUAD	0.6391
TCGA-55-A4DG-01A	LUAD	0.7232
TCGA-55-A57B-01A	LUAD	0.6309
TCGA-62-8394-01A	LUAD	0.7622
TCGA-62-8395-01A	LUAD	0.7146
TCGA-62-8397-01A	LUAD	0.7
TCGA-62-8398-01A	LUAD	0.6917
TCGA-62-8399-01A	LUAD	0.7107
TCGA-62-8402-01A	LUAD	0.7091
TCGA-62-A46O-01A	LUAD	0.9357
TCGA-62-A46P-01A	LUAD	0.8488
TCGA-62-A46R-01A	LUAD	0.6292
TCGA-62-A46S-01A	LUAD	0.7381
TCGA-62-A46U-01A	LUAD	0.5078
TCGA-62-A46V-01A	LUAD	0.7545
TCGA-62-A46Y-01A	LUAD	0.6126
TCGA-62-A470-01A	LUAD	0.7175
TCGA-62-A471-01A	LUAD	0.7466
TCGA-62-A472-01A	LUAD	0.7466
TCGA-64-1676-01A	LUAD	0.4716
TCGA-64-1677-01A	LUAD	0.7791
TCGA-64-1678-01A	LUAD	0.8146
TCGA-64-1679-01A	LUAD	0.5704
TCGA-64-1680-01A	LUAD	0.7508
TCGA-64-1681-01A	LUAD	0.6654
TCGA-64-5774-01A	LUAD	0.7704
TCGA-64-5775-01A	LUAD	0.6923
TCGA-64-5778-01A	LUAD	0.58
TCGA-64-5779-01A	LUAD	0.6064
TCGA-64-5781-01A	LUAD	0.5576
TCGA-64-5815-01A	LUAD	0.5551
TCGA-67-3770-01A	LUAD	0.6326
TCGA-67-3771-01A	LUAD	0.5991
TCGA-67-3772-01A	LUAD	0.5707
TCGA-67-3773-01A	LUAD	0.6599
TCGA-67-3774-01A	LUAD	0.6284
TCGA-67-3776-01A	LUAD	NaN
TCGA-67-4679-01B	LUAD	0.8218
TCGA-67-6215-01A	LUAD	0.7878
TCGA-67-6216-01A	LUAD	0.5915
TCGA-67-6217-01A	LUAD	0.578
TCGA-69-7760-01A	LUAD	0.7853
TCGA-69-7761-01A	LUAD	0.4103
TCGA-69-7763-01A	LUAD	0.6144
TCGA-69-7764-01A	LUAD	0.8079
TCGA-69-7765-01A	LUAD	0.539
TCGA-69-7973-01A	LUAD	0.7392
TCGA-69-7974-01A	LUAD	0.5606
TCGA-69-7978-01A	LUAD	0.3778
TCGA-69-7979-01A	LUAD	0.7452
TCGA-69-7980-01A	LUAD	0.7267
TCGA-69-8253-01A	LUAD	0.758
TCGA-69-8254-01A	LUAD	0.693
TCGA-69-8255-01A	LUAD	0.6203
TCGA-69-8453-01A	LUAD	0.4925
TCGA-69-A59K-01A	LUAD	0.6573
TCGA-71-6725-01A	LUAD	0.8068
TCGA-71-8520-01A	LUAD	0.6788
TCGA-73-4658-01A	LUAD	0.5334
TCGA-73-4659-01A	LUAD	0.6262
TCGA-73-4662-01A	LUAD	0.6275
TCGA-73-4666-01A	LUAD	0.5991
TCGA-73-4668-01A	LUAD	0.6655
TCGA-73-4670-01A	LUAD	0.7508
TCGA-73-4675-01A	LUAD	0.7027
TCGA-73-4676-01A	LUAD	0.7337
TCGA-73-4677-01A	LUAD	0.7019
TCGA-73-7498-01A	LUAD	0.7355
TCGA-73-7499-01A	LUAD	0.5676
TCGA-73-A9RS-01A	LUAD	0.7488
TCGA-75-5122-01A	LUAD	0.3382
TCGA-75-5125-01A	LUAD	0.5325
TCGA-75-5126-01A	LUAD	0.4674
TCGA-75-5146-01A	LUAD	0.6906
TCGA-75-5147-01A	LUAD	0.6223
TCGA-75-6203-01A	LUAD	0.4095
TCGA-75-6205-01A	LUAD	0.3236
TCGA-75-6206-01A	LUAD	0.8145
TCGA-75-6207-01A	LUAD	0.7977
TCGA-75-6211-01A	LUAD	0.5327
TCGA-75-6212-01A	LUAD	0.5599
TCGA-75-6214-01A	LUAD	0.7191
TCGA-75-7025-01A	LUAD	0.5637
TCGA-75-7027-01A	LUAD	0.7591
TCGA-75-7030-01A	LUAD	0.5982
TCGA-75-7031-01A	LUAD	0.6764
TCGA-78-7143-01A	LUAD	0.7784
TCGA-78-7145-01A	LUAD	0.734
TCGA-78-7146-01A	LUAD	0.7694
TCGA-78-7147-01A	LUAD	0.7508
TCGA-78-7148-01A	LUAD	0.7169
TCGA-78-7149-01A	LUAD	0.7983
TCGA-78-7150-01A	LUAD	0.749
TCGA-78-7152-01A	LUAD	0.6844
TCGA-78-7153-01A	LUAD	0.8237
TCGA-78-7154-01A	LUAD	0.8117
TCGA-78-7155-01A	LUAD	0.8811
TCGA-78-7156-01A	LUAD	0.8909
TCGA-78-7158-01A	LUAD	0.9088
TCGA-78-7159-01A	LUAD	0.5643
TCGA-78-7160-01A	LUAD	0.4858
TCGA-78-7161-01A	LUAD	0.8637
TCGA-78-7162-01A	LUAD	0.6477
TCGA-78-7163-01A	LUAD	0.7654
TCGA-78-7166-01A	LUAD	0.7045
TCGA-78-7167-01A	LUAD	0.8281
TCGA-78-7220-01A	LUAD	0.7356
TCGA-78-7535-01A	LUAD	0.7835
TCGA-78-7536-01A	LUAD	0.7846
TCGA-78-7537-01A	LUAD	0.8098
TCGA-78-7539-01A	LUAD	0.6168
TCGA-78-7540-01A	LUAD	0.7557
TCGA-78-7542-01A	LUAD	0.6054
TCGA-78-7633-01A	LUAD	0.874
TCGA-78-8640-01A	LUAD	0.7109
TCGA-78-8648-01A	LUAD	0.4118
TCGA-78-8655-01A	LUAD	0.6573
TCGA-78-8660-01A	LUAD	0.5202
TCGA-78-8662-01A	LUAD	0.8731
TCGA-80-5607-01A	LUAD	0.6465
TCGA-80-5608-01A	LUAD	0.6345
TCGA-80-5611-01A	LUAD	0.6307
TCGA-83-5908-01A	LUAD	0.4854
TCGA-86-6562-01A	LUAD	0.6059
TCGA-86-6851-01A	LUAD	0.4502
TCGA-86-7701-01A	LUAD	0.5066
TCGA-86-7711-01A	LUAD	0.5034
TCGA-86-7713-01A	LUAD	0.7792
TCGA-86-7714-01A	LUAD	0.7124
TCGA-86-7953-01A	LUAD	0.546
TCGA-86-7954-01A	LUAD	0.4711
TCGA-86-7955-01A	LUAD	0.869
TCGA-86-8054-01A	LUAD	0.8646
TCGA-86-8055-01A	LUAD	0.4782
TCGA-86-8056-01A	LUAD	0.6817
TCGA-86-8073-01A	LUAD	0.6105
TCGA-86-8074-01A	LUAD	0.6097
TCGA-86-8075-01A	LUAD	0.5429
TCGA-86-8076-01A	LUAD	0.45
TCGA-86-8278-01A	LUAD	0.6614
TCGA-86-8279-01A	LUAD	0.6975
TCGA-86-8280-01A	LUAD	0.5801
TCGA-86-8281-01A	LUAD	0.6889
TCGA-86-8358-01A	LUAD	0.8081
TCGA-86-8359-01A	LUAD	0.6717
TCGA-86-8585-01A	LUAD	0.5413
TCGA-86-8668-01A	LUAD	0.6406
TCGA-86-8669-01A	LUAD	0.6974
TCGA-86-8671-01A	LUAD	0.3802
TCGA-86-8672-01A	LUAD	0.5377
TCGA-86-8673-01A	LUAD	0.7244
TCGA-86-8674-01A	LUAD	0.6611
TCGA-86-A456-01A	LUAD	0.5977
TCGA-86-A4D0-01A	LUAD	0.8313
TCGA-86-A4JF-01A	LUAD	0.6573
TCGA-86-A4P7-01A	LUAD	0.5201
TCGA-86-A4P8-01A	LUAD	0.5144
TCGA-91-6828-01A	LUAD	0.5138
TCGA-91-6829-01A	LUAD	0.6335
TCGA-91-6830-01A	LUAD	0.5314
TCGA-91-6831-01A	LUAD	0.656
TCGA-91-6835-01A	LUAD	0.3848
TCGA-91-6836-01A	LUAD	0.7982
TCGA-91-6840-01A	LUAD	0.7434
TCGA-91-6847-01A	LUAD	0.9191
TCGA-91-6848-01A	LUAD	0.4348
TCGA-91-6849-01A	LUAD	0.6688
TCGA-91-7771-01A	LUAD	0.6621
TCGA-91-8496-01A	LUAD	0.7913
TCGA-91-8497-01A	LUAD	0.6351
TCGA-91-8499-01A	LUAD	0.7542
TCGA-91-A4BC-01A	LUAD	0.3736
TCGA-91-A4BD-01A	LUAD	0.7037
TCGA-93-7347-01A	LUAD	0.4277
TCGA-93-7348-01A	LUAD	0.5279
TCGA-93-8067-01A	LUAD	0.6998
TCGA-93-A4JN-01A	LUAD	0.6621
TCGA-93-A4JO-01A	LUAD	0.4597
TCGA-93-A4JP-01A	LUAD	0.6919
TCGA-93-A4JQ-01A	LUAD	0.4322
TCGA-95-7039-01A	LUAD	0.7014
TCGA-95-7043-01A	LUAD	0.8273
TCGA-95-7562-01A	LUAD	0.6951
TCGA-95-7567-01A	LUAD	0.6756
TCGA-95-7944-01A	LUAD	0.5358
TCGA-95-7947-01A	LUAD	0.7556
TCGA-95-7948-01A	LUAD	0.8167
TCGA-95-8039-01A	LUAD	0.5954
TCGA-95-8494-01A	LUAD	0.6973
TCGA-95-A4VK-01A	LUAD	0.6418
TCGA-95-A4VN-01A	LUAD	0.5148
TCGA-95-A4VP-01A	LUAD	0.6291
TCGA-97-7546-01A	LUAD	0.6975
TCGA-97-7547-01A	LUAD	0.6749
TCGA-97-7552-01A	LUAD	0.4233
TCGA-97-7553-01A	LUAD	0.4474
TCGA-97-7554-01A	LUAD	0.5815
TCGA-97-7937-01A	LUAD	0.6596
TCGA-97-7938-01A	LUAD	0.7431
TCGA-97-7941-01A	LUAD	0.6706
TCGA-97-8171-01A	LUAD	0.9309
TCGA-97-8172-01A	LUAD	0.6107
TCGA-97-8174-01A	LUAD	0.5242
TCGA-97-8175-01A	LUAD	0.6338
TCGA-97-8176-01A	LUAD	0.7626
TCGA-97-8177-01A	LUAD	0.406
TCGA-97-8179-01A	LUAD	0.765
TCGA-97-8547-01A	LUAD	0.6947
TCGA-97-8552-01A	LUAD	0.6412
TCGA-97-A4LX-01A	LUAD	0.3896
TCGA-97-A4M0-01A	LUAD	0.7152
TCGA-97-A4M1-01A	LUAD	0.7475
TCGA-97-A4M2-01A	LUAD	0.5034
TCGA-97-A4M3-01A	LUAD	0.7858
TCGA-97-A4M5-01A	LUAD	0.6407
TCGA-97-A4M6-01A	LUAD	0.5034
TCGA-97-A4M7-01A	LUAD	0.5507
TCGA-99-7458-01A	LUAD	0.4759
TCGA-99-8025-01A	LUAD	0.6365
TCGA-99-8028-01A	LUAD	0.3242
TCGA-99-8032-01A	LUAD	0.6462
TCGA-99-8033-01A	LUAD	0.5896
TCGA-99-AA5R-01A	LUAD	0.4704
TCGA-J2-8192-01A	LUAD	0.5494
TCGA-J2-8194-01A	LUAD	0.6495
TCGA-J2-A4AD-01A	LUAD	0.8129
TCGA-J2-A4AE-01A	LUAD	0.7158
TCGA-J2-A4AG-01A	LUAD	0.5169
TCGA-L4-A4E5-01A	LUAD	0.6887
TCGA-L4-A4E6-01A	LUAD	0.5016
TCGA-L9-A443-01A	LUAD	0.7366
TCGA-L9-A444-01A	LUAD	0.5395
TCGA-L9-A50W-01A	LUAD	0.7251
TCGA-L9-A5IP-01A	LUAD	0.7466
TCGA-L9-A743-01A	LUAD	0.3926
TCGA-L9-A7SV-01A	LUAD	0.8126
TCGA-L9-A8F4-01A	LUAD	0.4757
TCGA-MN-A4N1-01A	LUAD	0.8378
TCGA-MN-A4N4-01A	LUAD	0.6214
TCGA-MN-A4N5-01A	LUAD	0.6829
TCGA-MP-A4SV-01A	LUAD	0.6126
TCGA-MP-A4SW-01A	LUAD	0.5685
TCGA-MP-A4SY-01A	LUAD	0.6857
TCGA-MP-A4T2-01A	LUAD	0.6963
TCGA-MP-A4T4-01A	LUAD	0.393
TCGA-MP-A4T6-01A	LUAD	0.8047
TCGA-MP-A4T7-01A	LUAD	0.7243
TCGA-MP-A4T8-01A	LUAD	0.7574
TCGA-MP-A4T9-01A	LUAD	0.5925
TCGA-MP-A4TA-01A	LUAD	0.5554
TCGA-MP-A4TC-01A	LUAD	0.5243
TCGA-MP-A4TD-01A	LUAD	0.5888
TCGA-MP-A4TE-01A	LUAD	0.7516
TCGA-MP-A4TF-01A	LUAD	0.7019
TCGA-MP-A4TH-01A	LUAD	0.5225
TCGA-MP-A4TI-01A	LUAD	0.3025
TCGA-MP-A4TJ-01A	LUAD	0.418
TCGA-MP-A4TK-01A	LUAD	0.5836
TCGA-MP-A5C7-01A	LUAD	0.8071
TCGA-NJ-A4YF-01A	LUAD	0.7913
TCGA-NJ-A4YG-01A	LUAD	0.632
TCGA-NJ-A4YI-01A	LUAD	0.6935
TCGA-NJ-A4YP-01A	LUAD	0.614
TCGA-NJ-A4YQ-01A	LUAD	0.4331
TCGA-NJ-A55A-01A	LUAD	0.5566
TCGA-NJ-A55O-01A	LUAD	0.6928
TCGA-NJ-A55R-01A	LUAD	0.7913
TCGA-NJ-A7XG-01A	LUAD	0.773
TCGA-O1-A52J-01A	LUAD	0.6489
TCGA-S2-AA1A-01A	LUAD	0.43
TCGA-18-3406-01A	LUSC	0.5279
TCGA-18-3407-01A	LUSC	0.6126
TCGA-18-3408-01A	LUSC	0.7141
TCGA-18-3409-01A	LUSC	0.6749
TCGA-18-3410-01A	LUSC	0.7645
TCGA-18-3411-01A	LUSC	0.6655
TCGA-18-3412-01A	LUSC	0.9025
TCGA-18-3414-01A	LUSC	0.8835
TCGA-18-3415-01A	LUSC	0.6181
TCGA-18-3416-01A	LUSC	0.6465
TCGA-18-3417-01A	LUSC	0.6331
TCGA-18-3419-01A	LUSC	0.7034
TCGA-18-3421-01A	LUSC	0.6573
TCGA-18-4083-01A	LUSC	0.8171
TCGA-18-4086-01A	LUSC	0.6836
TCGA-18-4721-01A	LUSC	0.5327
TCGA-18-5592-01A	LUSC	0.8393
TCGA-18-5595-01A	LUSC	0.9493
TCGA-21-1070-01A	LUSC	0.6078
TCGA-21-1071-01A	LUSC	0.7243
TCGA-21-1072-01A	LUSC	0.8646
TCGA-21-1075-01A	LUSC	0.874
TCGA-21-1076-01A	LUSC	0.3107
TCGA-21-1077-01A	LUSC	0.6037
TCGA-21-1078-01A	LUSC	0.9869
TCGA-21-1079-01A	LUSC	0.7281
TCGA-21-1080-01A	LUSC	0.8744
TCGA-21-1081-01A	LUSC	0.6573
TCGA-21-1082-01A	LUSC	0.6851
TCGA-21-1083-01A	LUSC	0.7129
TCGA-21-5782-01A	LUSC	0.6888
TCGA-21-5783-01A	LUSC	0.7261
TCGA-21-5784-01A	LUSC	0.3985
TCGA-21-5786-01A	LUSC	0.7458
TCGA-21-5787-01A	LUSC	0.614
TCGA-21-A5DI-01A	LUSC	0.8983
TCGA-22-0940-01A	LUSC	0.4622
TCGA-22-0944-01A	LUSC	0.6573
TCGA-22-1000-01A	LUSC	0.2998
TCGA-22-1002-01A	LUSC	0.6123
TCGA-22-1005-01A	LUSC	0.3405
TCGA-22-1011-01A	LUSC	0.5828
TCGA-22-1012-01A	LUSC	0.6215
TCGA-22-1016-01A	LUSC	0.495
TCGA-22-1017-01A	LUSC	0.774
TCGA-22-4591-01A	LUSC	0.8583
TCGA-22-4593-01A	LUSC	0.7136
TCGA-22-4594-01A	LUSC	0.4618
TCGA-22-4595-01A	LUSC	0.8806
TCGA-22-4596-01A	LUSC	0.3332
TCGA-22-4599-01A	LUSC	0.6362
TCGA-22-4601-01A	LUSC	0.8997
TCGA-22-4604-01A	LUSC	0.6601
TCGA-22-4605-01A	LUSC	0.5712
TCGA-22-4607-01A	LUSC	0.7496
TCGA-22-4609-01A	LUSC	0.5383
TCGA-22-4613-01A	LUSC	0.6471
TCGA-22-5471-01A	LUSC	0.6566
TCGA-22-5472-01A	LUSC	0.7454
TCGA-22-5473-01A	LUSC	0.773
TCGA-22-5474-01A	LUSC	0.5739
TCGA-22-5477-01A	LUSC	0.8716
TCGA-22-5478-01A	LUSC	0.5894
TCGA-22-5479-01A	LUSC	0.5748
TCGA-22-5480-01A	LUSC	0.716
TCGA-22-5481-01A	LUSC	0.7686
TCGA-22-5482-01A	LUSC	0.7887
TCGA-22-5483-01A	LUSC	0.809
TCGA-22-5485-01A	LUSC	0.8083
TCGA-22-5489-01A	LUSC	0.5441
TCGA-22-5491-01A	LUSC	0.8394
TCGA-22-5492-01A	LUSC	0.5967
TCGA-22-A5C4-01A	LUSC	0.8168
TCGA-33-4532-01A	LUSC	0.836
TCGA-33-4533-01A	LUSC	0.8335
TCGA-33-4538-01A	LUSC	0.769
TCGA-33-4547-01A	LUSC	0.8712
TCGA-33-4566-01A	LUSC	0.6537
TCGA-33-4579-01A	LUSC	NaN
TCGA-33-4582-01A	LUSC	0.6796
TCGA-33-4583-01A	LUSC	0.7022
TCGA-33-4586-01A	LUSC	0.5774
TCGA-33-4587-01A	LUSC	0.9215
TCGA-33-4589-01A	LUSC	0.5074
TCGA-33-6737-01A	LUSC	0.6181
TCGA-33-6738-01A	LUSC	0.6327
TCGA-33-A4WN-01A	LUSC	0.7913
TCGA-33-A5GW-01A	LUSC	0.9358
TCGA-33-AAS8-01A	LUSC	0.8353
TCGA-33-AASB-01A	LUSC	0.8472
TCGA-33-AASD-01A	LUSC	0.8043
TCGA-33-AASI-01A	LUSC	0.8567
TCGA-33-AASJ-01A	LUSC	0.9253
TCGA-33-AASL-01A	LUSC	0.8464
TCGA-34-2596-01A	LUSC	0.7665
TCGA-34-2600-01A	LUSC	0.944
TCGA-34-2604-01A	LUSC	0.5686
TCGA-34-2605-01A	LUSC	0.7013
TCGA-34-2608-01A	LUSC	0.4379
TCGA-34-2609-01A	LUSC	0.6512
TCGA-34-5231-01A	LUSC	0.7277
TCGA-34-5232-01A	LUSC	0.4285
TCGA-34-5234-01A	LUSC	0.3632
TCGA-34-5236-01A	LUSC	0.5807
TCGA-34-5239-01A	LUSC	0.5599
TCGA-34-5240-01A	LUSC	0.7721
TCGA-34-5241-01A	LUSC	0.5134
TCGA-34-5927-01A	LUSC	0.8421
TCGA-34-5928-01A	LUSC	0.5653
TCGA-34-5929-01A	LUSC	0.692
TCGA-34-7107-01A	LUSC	0.7223
TCGA-34-8454-01A	LUSC	0.5035
TCGA-34-8455-01A	LUSC	0.6573
TCGA-34-8456-01A	LUSC	0.773
TCGA-34-A5IX-01A	LUSC	0.7466
TCGA-37-3783-01A	LUSC	0.5283
TCGA-37-3789-01A	LUSC	0.7019
TCGA-37-3792-01A	LUSC	0.5422
TCGA-37-4129-01A	LUSC	0.6465
TCGA-37-4130-01A	LUSC	0.5422
TCGA-37-4132-01A	LUSC	0.7019
TCGA-37-4133-01A	LUSC	0.7913
TCGA-37-4135-01A	LUSC	0.8056
TCGA-37-4141-01A	LUSC	0.7672
TCGA-37-5819-01A	LUSC	0.8361
TCGA-37-A5EL-01A	LUSC	0.9421
TCGA-37-A5EM-01A	LUSC	0.604
TCGA-37-A5EN-01A	LUSC	0.8846
TCGA-39-5011-01A	LUSC	0.5233
TCGA-39-5016-01A	LUSC	0.7433
TCGA-39-5019-01A	LUSC	0.6534
TCGA-39-5021-01A	LUSC	0.5422
TCGA-39-5022-01A	LUSC	0.3782
TCGA-39-5024-01A	LUSC	0.4369
TCGA-39-5027-01A	LUSC	0.7369
TCGA-39-5028-01A	LUSC	0.5509
TCGA-39-5029-01A	LUSC	0.5575
TCGA-39-5030-01A	LUSC	0.4087
TCGA-39-5031-01A	LUSC	0.6254
TCGA-39-5034-01A	LUSC	0.6667
TCGA-39-5035-01A	LUSC	0.5896
TCGA-39-5036-01A	LUSC	0.7588
TCGA-39-5037-01A	LUSC	0.7058
TCGA-39-5039-01A	LUSC	0.5831
TCGA-39-5040-01A	LUSC	0.8039
TCGA-43-2576-01A	LUSC	0.4527
TCGA-43-2578-01A	LUSC	0.8513
TCGA-43-2581-01A	LUSC	0.4379
TCGA-43-3394-01A	LUSC	0.8665
TCGA-43-3920-01A	LUSC	0.656
TCGA-43-5668-01A	LUSC	0.502
TCGA-43-5670-01A	LUSC	0.7508
TCGA-43-6143-01A	LUSC	0.8458
TCGA-43-6647-01A	LUSC	0.3975
TCGA-43-6770-01A	LUSC	0.7717
TCGA-43-6771-01A	LUSC	0.6494
TCGA-43-6773-01A	LUSC	0.5098
TCGA-43-7656-01A	LUSC	0.6644
TCGA-43-7657-01A	LUSC	0.7292
TCGA-43-7658-01A	LUSC	0.8274
TCGA-43-8115-01A	LUSC	0.419
TCGA-43-8116-01A	LUSC	0.6915
TCGA-43-8118-01A	LUSC	0.6635
TCGA-43-A474-01A	LUSC	0.836
TCGA-43-A475-01A	LUSC	0.4973
TCGA-43-A56U-01A	LUSC	0.4289
TCGA-43-A56V-01A	LUSC	0.8744
TCGA-46-3765-01A	LUSC	0.7446
TCGA-46-3766-01A	LUSC	0.3905
TCGA-46-3767-01A	LUSC	0.6325
TCGA-46-3768-01A	LUSC	0.874
TCGA-46-3769-01A	LUSC	0.6086
TCGA-46-6025-01A	LUSC	0.7932
TCGA-46-6026-01A	LUSC	0.8758
TCGA-51-4079-01A	LUSC	0.7603
TCGA-51-4080-01A	LUSC	0.93
TCGA-51-4081-01A	LUSC	0.827
TCGA-51-6867-01A	LUSC	0.7994
TCGA-52-7622-01A	LUSC	0.5485
TCGA-52-7809-01A	LUSC	0.6793
TCGA-52-7810-01A	LUSC	0.7048
TCGA-52-7811-01A	LUSC	0.4559
TCGA-52-7812-01A	LUSC	0.6939
TCGA-56-1622-01A	LUSC	0.9224
TCGA-56-5897-01A	LUSC	0.3722
TCGA-56-5898-01A	LUSC	0.7002
TCGA-56-6545-01A	LUSC	0.4759
TCGA-56-6546-01A	LUSC	0.4851
TCGA-56-7221-01A	LUSC	0.7074
TCGA-56-7222-01A	LUSC	0.6884
TCGA-56-7223-01A	LUSC	0.9782
TCGA-56-7579-01A	LUSC	0.6465
TCGA-56-7580-01A	LUSC	0.666
TCGA-56-7582-01A	LUSC	0.7664
TCGA-56-7730-01A	LUSC	0.9094
TCGA-56-7731-01A	LUSC	0.4905
TCGA-56-7822-01A	LUSC	0.5781
TCGA-56-7823-01B	LUSC	0.724
TCGA-56-8082-01A	LUSC	0.8211
TCGA-56-8083-01A	LUSC	0.9587
TCGA-56-8201-01A	LUSC	0.3661
TCGA-56-8304-01A	LUSC	0.6573
TCGA-56-8305-01A	LUSC	0.746
TCGA-56-8307-01A	LUSC	0.6589
TCGA-56-8308-01A	LUSC	0.6207
TCGA-56-8309-01A	LUSC	0.4192
TCGA-56-8503-01A	LUSC	0.4009
TCGA-56-8504-01A	LUSC	0.6486
TCGA-56-8622-01A	LUSC	0.6141
TCGA-56-8623-01A	LUSC	0.5632
TCGA-56-8624-01A	LUSC	0.7099
TCGA-56-8625-01A	LUSC	0.4194
TCGA-56-8626-01A	LUSC	0.7398
TCGA-56-8628-01A	LUSC	0.6278
TCGA-56-8629-01A	LUSC	0.7898
TCGA-56-A49D-01A	LUSC	0.7062
TCGA-56-A4BW-01A	LUSC	0.7019
TCGA-56-A4BX-01A	LUSC	0.8206
TCGA-56-A4BY-01A	LUSC	0.7913
TCGA-56-A4ZJ-01A	LUSC	0.4783
TCGA-56-A4ZK-01A	LUSC	0.6573
TCGA-56-A5DR-01A	LUSC	0.7466
TCGA-56-A5DS-01A	LUSC	0.5814
TCGA-56-A62T-01A	LUSC	0.881
TCGA-58-8386-01A	LUSC	0.6054
TCGA-58-8387-01A	LUSC	0.5233
TCGA-58-8388-01A	LUSC	0.6977
TCGA-58-8390-01A	LUSC	0.734
TCGA-58-8391-01A	LUSC	0.8602
TCGA-58-8392-01A	LUSC	0.7913
TCGA-58-8393-01A	LUSC	0.5349
TCGA-58-A46J-01A	LUSC	0.7761
TCGA-58-A46K-01A	LUSC	0.7737
TCGA-58-A46L-01A	LUSC	0.7019
TCGA-58-A46M-01A	LUSC	0.7445
TCGA-58-A46N-01A	LUSC	0.902
TCGA-60-2695-01A	LUSC	0.79
TCGA-60-2696-01A	LUSC	0.6792
TCGA-60-2697-01A	LUSC	0.3589
TCGA-60-2698-01A	LUSC	0.5914
TCGA-60-2703-01A	LUSC	0.5999
TCGA-60-2704-01A	LUSC	0.415
TCGA-60-2706-01A	LUSC	0.659
TCGA-60-2707-01A	LUSC	0.6296
TCGA-60-2708-01A	LUSC	0.7129
TCGA-60-2709-01A	LUSC	0.4263
TCGA-60-2710-01A	LUSC	0.7792
TCGA-60-2711-01A	LUSC	0.7982
TCGA-60-2712-01A	LUSC	0.5043
TCGA-60-2713-01A	LUSC	0.7603
TCGA-60-2714-01A	LUSC	0.6126
TCGA-60-2715-01A	LUSC	0.3431
TCGA-60-2716-01A	LUSC	0.7931
TCGA-60-2719-01A	LUSC	0.912
TCGA-60-2720-01A	LUSC	0.6483
TCGA-60-2721-01A	LUSC	0.7413
TCGA-60-2722-01A	LUSC	0.9121
TCGA-60-2723-01A	LUSC	0.6353
TCGA-60-2724-01A	LUSC	0.7219
TCGA-60-2725-01A	LUSC	0.4323
TCGA-60-2726-01A	LUSC	0.7913
TCGA-63-5128-01A	LUSC	0.8456
TCGA-63-5131-01A	LUSC	0.7443
TCGA-63-6202-01A	LUSC	0.4318
TCGA-63-7020-01A	LUSC	0.6181
TCGA-63-7021-01A	LUSC	0.511
TCGA-63-7022-01A	LUSC	0.3308
TCGA-63-7023-01A	LUSC	0.8653
TCGA-63-A5M9-01A	LUSC	0.8116
TCGA-63-A5MB-01A	LUSC	0.836
TCGA-63-A5MG-01A	LUSC	0.6126
TCGA-63-A5MH-01A	LUSC	0.7435
TCGA-63-A5MI-01A	LUSC	0.7996
TCGA-63-A5MJ-01A	LUSC	0.7913
TCGA-63-A5ML-01A	LUSC	0.851
TCGA-63-A5MM-01A	LUSC	0.4502
TCGA-63-A5MN-01A	LUSC	0.3216
TCGA-63-A5MP-01A	LUSC	0.6573
TCGA-63-A5MR-01A	LUSC	0.7075
TCGA-63-A5MS-01A	LUSC	0.5599
TCGA-63-A5MT-01A	LUSC	0.6126
TCGA-63-A5MU-01A	LUSC	0.8006
TCGA-63-A5MV-01A	LUSC	0.6126
TCGA-63-A5MW-01A	LUSC	0.8216
TCGA-63-A5MY-01A	LUSC	0.8158
TCGA-66-2727-01A	LUSC	0.7825
TCGA-66-2734-01A	LUSC	0.5779
TCGA-66-2737-01A	LUSC	0.5191
TCGA-66-2742-01A	LUSC	0.737
TCGA-66-2744-01A	LUSC	0.5138
TCGA-66-2746-01A	LUSC	NaN
TCGA-66-2747-01A	LUSC	NaN
TCGA-66-2750-01A	LUSC	NaN
TCGA-66-2751-01A	LUSC	NaN
TCGA-66-2752-01A	LUSC	NaN
TCGA-66-2753-01A	LUSC	0.7495
TCGA-66-2754-01A	LUSC	0.9556
TCGA-66-2755-01A	LUSC	0.4474
TCGA-66-2756-01A	LUSC	0.8456
TCGA-66-2757-01A	LUSC	0.7913
TCGA-66-2758-01A	LUSC	0.6709
TCGA-66-2759-01A	LUSC	0.6908
TCGA-66-2763-01A	LUSC	0.7982
TCGA-66-2765-01A	LUSC	0.6465
TCGA-66-2766-01A	LUSC	0.8428
TCGA-66-2767-01A	LUSC	0.419
TCGA-66-2768-01A	LUSC	0.7034
TCGA-66-2769-01A	LUSC	0.4664
TCGA-66-2770-01A	LUSC	0.6844
TCGA-66-2771-01A	LUSC	0.5801
TCGA-66-2773-01A	LUSC	0.6509
TCGA-66-2777-01A	LUSC	0.8141
TCGA-66-2778-01A	LUSC	0.7403
TCGA-66-2780-01A	LUSC	0.6836
TCGA-66-2781-01A	LUSC	0.7466
TCGA-66-2782-01A	LUSC	0.5779
TCGA-66-2783-01A	LUSC	0.7488
TCGA-66-2785-01A	LUSC	0.5422
TCGA-66-2786-01A	LUSC	0.6573
TCGA-66-2787-01A	LUSC	0.6515
TCGA-66-2788-01A	LUSC	0.5517
TCGA-66-2789-01A	LUSC	0.6839
TCGA-66-2790-01A	LUSC	0.7034
TCGA-66-2791-01A	LUSC	0.6526
TCGA-66-2792-01A	LUSC	0.7887
TCGA-66-2793-01A	LUSC	0.9783
TCGA-66-2794-01A	LUSC	0.7603
TCGA-66-2795-01A	LUSC	0.7887
TCGA-66-2800-01A	LUSC	0.6624
TCGA-68-7755-01A	LUSC	0.7922
TCGA-68-7756-01A	LUSC	0.6275
TCGA-68-7757-01B	LUSC	0.5031
TCGA-68-8250-01A	LUSC	0.6391
TCGA-68-8251-01A	LUSC	0.5736
TCGA-68-A59I-01A	LUSC	0.6344
TCGA-68-A59J-01A	LUSC	0.7535
TCGA-6A-AB49-01A	LUSC	0.7967
TCGA-70-6722-01A	LUSC	0.536
TCGA-70-6723-01A	LUSC	0.9697
TCGA-77-6842-01A	LUSC	0.511
TCGA-77-6843-01A	LUSC	0.7887
TCGA-77-6844-01A	LUSC	0.7887
TCGA-77-6845-01A	LUSC	0.9076
TCGA-77-7138-01A	LUSC	0.6403
TCGA-77-7139-01A	LUSC	0.7377
TCGA-77-7140-01A	LUSC	0.8606
TCGA-77-7141-01A	LUSC	0.7965
TCGA-77-7142-01A	LUSC	0.7986
TCGA-77-7335-01A	LUSC	0.5517
TCGA-77-7337-01A	LUSC	0.6576
TCGA-77-7338-01A	LUSC	0.6655
TCGA-77-7463-01A	LUSC	0.6268
TCGA-77-7465-01A	LUSC	0.6458
TCGA-77-8007-01A	LUSC	0.381
TCGA-77-8008-01A	LUSC	0.4526
TCGA-77-8009-01A	LUSC	0.8611
TCGA-77-8128-01A	LUSC	0.7697
TCGA-77-8130-01A	LUSC	0.6221
TCGA-77-8131-01A	LUSC	0.3242
TCGA-77-8133-01A	LUSC	0.6246
TCGA-77-8136-01A	LUSC	0.4786
TCGA-77-8138-01A	LUSC	0.575
TCGA-77-8139-01A	LUSC	0.4474
TCGA-77-8140-01A	LUSC	0.6661
TCGA-77-8143-01A	LUSC	0.7792
TCGA-77-8144-01A	LUSC	0.6782
TCGA-77-8145-01A	LUSC	0.6368
TCGA-77-8146-01A	LUSC	0.7019
TCGA-77-8148-01A	LUSC	0.7129
TCGA-77-8150-01A	LUSC	0.7102
TCGA-77-8153-01A	LUSC	0.7466
TCGA-77-8154-01A	LUSC	0.8077
TCGA-77-8156-01A	LUSC	0.4534
TCGA-77-A5FZ-01A	LUSC	0.1926
TCGA-77-A5G1-01A	LUSC	0.6126
TCGA-77-A5G3-01A	LUSC	0.8179
TCGA-77-A5G6-01A	LUSC	0.8184
TCGA-77-A5G7-01B	LUSC	0.5903
TCGA-77-A5G8-01B	LUSC	0.7019
TCGA-77-A5GA-01A	LUSC	0.6197
TCGA-77-A5GB-01B	LUSC	0.6358
TCGA-77-A5GF-01A	LUSC	0.8082
TCGA-77-A5GH-01A	LUSC	0.4658
TCGA-79-5596-01A	LUSC	0.8266
TCGA-85-6175-01A	LUSC	0.5585
TCGA-85-6560-01A	LUSC	0.6656
TCGA-85-6561-01A	LUSC	0.4095
TCGA-85-6798-01A	LUSC	0.729
TCGA-85-7696-01A	LUSC	0.8163
TCGA-85-7697-01A	LUSC	0.5804
TCGA-85-7698-01A	LUSC	0.7388
TCGA-85-7699-01A	LUSC	0.6264
TCGA-85-7710-01A	LUSC	0.8126
TCGA-85-7843-01A	LUSC	0.6742
TCGA-85-7844-01A	LUSC	0.6146
TCGA-85-7950-01A	LUSC	0.5969
TCGA-85-8048-01A	LUSC	0.3604
TCGA-85-8049-01A	LUSC	0.4357
TCGA-85-8052-01A	LUSC	0.6469
TCGA-85-8070-01A	LUSC	0.9026
TCGA-85-8071-01A	LUSC	0.9177
TCGA-85-8072-01A	LUSC	0.7465
TCGA-85-8276-01A	LUSC	0.5013
TCGA-85-8277-01A	LUSC	0.7258
TCGA-85-8287-01A	LUSC	0.4853
TCGA-85-8288-01A	LUSC	0.6913
TCGA-85-8350-01A	LUSC	0.6028
TCGA-85-8351-01A	LUSC	0.6858
TCGA-85-8352-01A	LUSC	0.9876
TCGA-85-8353-01A	LUSC	0.5628
TCGA-85-8354-01A	LUSC	0.911
TCGA-85-8355-01A	LUSC	0.3979
TCGA-85-8479-01A	LUSC	0.7019
TCGA-85-8481-01A	LUSC	0.5649
TCGA-85-8580-01A	LUSC	0.6126
TCGA-85-8582-01A	LUSC	0.5901
TCGA-85-8584-01A	LUSC	0.6126
TCGA-85-8664-01A	LUSC	0.7564
TCGA-85-8666-01A	LUSC	0.6352
TCGA-85-A4CL-01A	LUSC	0.6834
TCGA-85-A4CN-01A	LUSC	0.7019
TCGA-85-A4JB-01A	LUSC	0.7019
TCGA-85-A4JC-01A	LUSC	0.6845
TCGA-85-A4PA-01A	LUSC	0.1477
TCGA-85-A4QQ-01A	LUSC	0.6573
TCGA-85-A4QR-01A	LUSC	0.7913
TCGA-85-A50M-01A	LUSC	0.7019
TCGA-85-A50Z-01A	LUSC	0.7019
TCGA-85-A510-01A	LUSC	0.6437
TCGA-85-A511-01A	LUSC	0.6176
TCGA-85-A512-01A	LUSC	0.8318
TCGA-85-A513-01A	LUSC	0.4337
TCGA-85-A53L-01A	LUSC	0.7243
TCGA-85-A5B5-01A	LUSC	0.919
TCGA-90-6837-01A	LUSC	0.5552
TCGA-90-7766-01A	LUSC	0.73
TCGA-90-7767-01A	LUSC	0.6306
TCGA-90-7769-01A	LUSC	0.8243
TCGA-90-7964-01A	LUSC	0.7288
TCGA-90-A4ED-01A	LUSC	0.706
TCGA-90-A4EE-01A	LUSC	0.4679
TCGA-90-A59Q-01A	LUSC	0.4726
TCGA-92-7340-01A	LUSC	0.6093
TCGA-92-7341-01A	LUSC	0.7643
TCGA-92-8063-01A	LUSC	0.6465
TCGA-92-8064-01A	LUSC	0.4947
TCGA-92-8065-01A	LUSC	0.637
TCGA-94-7033-01A	LUSC	0.6634
TCGA-94-7557-01A	LUSC	0.6086
TCGA-94-7943-01A	LUSC	0.7667
TCGA-94-8035-01A	LUSC	0.5813
TCGA-94-8490-01A	LUSC	0.8434
TCGA-94-8491-01A	LUSC	0.6167
TCGA-94-A4VJ-01A	LUSC	0.7581
TCGA-94-A5I4-01A	LUSC	0.8602
TCGA-94-A5I6-01A	LUSC	0.8752
TCGA-96-7544-01A	LUSC	0.6422
TCGA-96-7545-01A	LUSC	0.6006
TCGA-96-8169-01A	LUSC	0.643
TCGA-96-8170-01A	LUSC	0.6409
TCGA-96-A4JK-01A	LUSC	0.7019
TCGA-96-A4JL-01A	LUSC	0.4837
TCGA-98-7454-01A	LUSC	0.394
TCGA-98-8020-01A	LUSC	0.5991
TCGA-98-8021-01A	LUSC	0.7345
TCGA-98-8022-01A	LUSC	0.5867
TCGA-98-8023-01A	LUSC	0.4752
TCGA-98-A538-01A	LUSC	0.7019
TCGA-98-A539-01A	LUSC	0.7466
TCGA-98-A53A-01A	LUSC	0.6724
TCGA-98-A53B-01A	LUSC	0.7019
TCGA-98-A53C-01A	LUSC	0.3703
TCGA-98-A53D-01A	LUSC	0.4181
TCGA-98-A53H-01A	LUSC	0.3879
TCGA-98-A53I-01A	LUSC	0.6609
TCGA-98-A53J-01A	LUSC	0.6573
TCGA-J1-A4AH-01A	LUSC	0.7741
TCGA-L3-A4E7-01A	LUSC	0.7243
TCGA-L3-A524-01A	LUSC	0.8973
TCGA-LA-A446-01A	LUSC	0.7742
TCGA-LA-A7SW-01A	LUSC	0.92
TCGA-MF-A522-01A	LUSC	0.9253
TCGA-NC-A5HD-01A	LUSC	0.7779
TCGA-NC-A5HE-01A	LUSC	0.4126
TCGA-NC-A5HF-01A	LUSC	0.8257
TCGA-NC-A5HG-01A	LUSC	0.7357
TCGA-NC-A5HH-01A	LUSC	0.8494
TCGA-NC-A5HI-01A	LUSC	0.7565
TCGA-NC-A5HJ-01A	LUSC	0.559
TCGA-NC-A5HK-01A	LUSC	0.8361
TCGA-NC-A5HL-01A	LUSC	0.7243
TCGA-NC-A5HM-01A	LUSC	0.7449
TCGA-NC-A5HN-01A	LUSC	0.7913
TCGA-NC-A5HO-01A	LUSC	0.7913
TCGA-NC-A5HP-01A	LUSC	0.8233
TCGA-NC-A5HQ-01A	LUSC	0.6728
TCGA-NC-A5HR-01A	LUSC	0.7466
TCGA-NC-A5HT-01A	LUSC	0.6573
TCGA-NK-A5CR-01A	LUSC	0.6657
TCGA-NK-A5CT-01A	LUSC	0.6573
TCGA-NK-A5CX-01A	LUSC	0.6126
TCGA-NK-A5D1-01A	LUSC	0.9478
TCGA-NK-A7XE-01A	LUSC	0.7709
TCGA-O2-A52N-01A	LUSC	0.7706
TCGA-O2-A52Q-01A	LUSC	0.5891
TCGA-O2-A52S-01A	LUSC	0.8131
TCGA-O2-A52V-01A	LUSC	0.7568
TCGA-O2-A52W-01A	LUSC	0.7654
TCGA-O2-A5IB-01A	LUSC	0.9422
TCGA-O2-A5IC-01A	LUSC	NaN
TCGA-XC-AA0X-01A	LUSC	0.6313
Note: NaN is an abbreviation for not a number, which indicates no numberical number output from the analysis undertake n

## Sheet: Table S2
Table S2: Leukocytes Fraction for TCGA samples
TCGA Participant Barcode	TCGA Study	Leukocyte Fraction
TCGA-17-Z013	LUAD	0.108714
TCGA-17-Z020	LUAD	0.702437
TCGA-17-Z022	LUAD	0.257411
TCGA-17-Z038	LUAD	0.0620936
TCGA-17-Z048	LUAD	0.213481
TCGA-17-Z050	LUAD	0.214665
TCGA-50-5049	LUAD	0.568416
TCGA-62-8402	LUAD	0.272187
TCGA-91-6831	LUAD	0.25301
TCGA-18-3419	LUSC	0.335695
TCGA-21-5783	LUSC	0.20293
TCGA-22-4604	LUSC	0.0552811
TCGA-22-5478	LUSC	0.306704
TCGA-22-5485	LUSC	0.11834
TCGA-22-5489	LUSC	0.377386
TCGA-22-5492	LUSC	0.326544
TCGA-34-2596	LUSC	0.278598
TCGA-34-5240	LUSC	0.12396
TCGA-34-5928	LUSC	0.231994
TCGA-34-8456	LUSC	0.184523
TCGA-34-A5IX	LUSC	0.439841
TCGA-37-4141	LUSC	0.225083
TCGA-43-2576	LUSC	NA
TCGA-43-2578	LUSC	0.684284
TCGA-43-6770	LUSC	0.254356
TCGA-91-6847	LUAD	0.0727747
TCGA-91-8497	LUAD	0.312204
TCGA-17-Z010	LUAD	0.374795
TCGA-17-Z016	LUAD	0.116226
TCGA-17-Z034	LUAD	0.433557
TCGA-17-Z037	LUAD	0.32016
TCGA-17-Z041	LUAD	0.0889227
TCGA-17-Z045	LUAD	0.467213
TCGA-17-Z047	LUAD	0.468983
TCGA-17-Z053	LUAD	0.35949
TCGA-50-5936	LUAD	0.271949
TCGA-62-8395	LUAD	0.155467
TCGA-78-7143	LUAD	0.190715
TCGA-91-6849	LUAD	0.25803
TCGA-56-7222	LUSC	0.228589
TCGA-60-2697	LUSC	0.662048
TCGA-60-2716	LUSC	0.0194528
TCGA-60-2724	LUSC	0.0296732
TCGA-91-8496	LUAD	0.178633
TCGA-63-7020	LUSC	0.272528
TCGA-63-A5M9	LUSC	0.196599
TCGA-63-A5MJ	LUSC	0.201517
TCGA-63-A5MN	LUSC	0.603101
TCGA-63-A5MS	LUSC	0.432643
TCGA-17-Z015	LUAD	0.132057
TCGA-17-Z032	LUAD	0.311397
TCGA-66-2754	LUSC	0.0934284
TCGA-66-2767	LUSC	0.364985
TCGA-17-Z033	LUAD	0.299407
TCGA-70-6722	LUSC	0.377737
TCGA-70-6723	LUSC	0.0519927
TCGA-17-Z059	LUAD	0.308432
TCGA-77-6845	LUSC	0.0659662
TCGA-77-7337	LUSC	0.29799
TCGA-77-8009	LUSC	0.0701746
TCGA-77-8133	LUSC	0.383994
TCGA-77-8136	LUSC	0.504166
TCGA-77-8140	LUSC	0.352467
TCGA-77-8144	LUSC	0.213689
TCGA-77-A5G3	LUSC	0.171904
TCGA-77-A5GF	LUSC	0.207604
TCGA-50-5930	LUAD	0.438796
TCGA-50-5932	LUAD	0.0800958
TCGA-62-8399	LUAD	0.212847
TCGA-85-8351	LUSC	0.259701
TCGA-85-8354	LUSC	0.103884
TCGA-85-8479	LUSC	0.287685
TCGA-85-8481	LUSC	0.432434
TCGA-85-8664	LUSC	0.200068
TCGA-85-A511	LUSC	0.428876
TCGA-78-7162	LUAD	0.331893
TCGA-91-6830	LUAD	0.323279
TCGA-91-6835	LUAD	0.506208
TCGA-91-6836	LUAD	0.206169
TCGA-97-8547	LUAD	0.24642
TCGA-17-Z004	LUAD	0.0687761
TCGA-17-Z005	LUAD	0.614477
TCGA-90-7767	LUSC	0.285415
TCGA-90-A4ED	LUSC	0.226152
TCGA-90-A4EE	LUSC	0.470952
TCGA-17-Z014	LUAD	0.218232
TCGA-17-Z024	LUAD	0.187027
TCGA-17-Z026	LUAD	0.343792
TCGA-94-A5I4	LUSC	0.188977
TCGA-17-Z054	LUAD	0.169508
TCGA-96-7545	LUSC	0.347848
TCGA-96-8169	LUSC	0.360064
TCGA-50-5935	LUAD	0.194456
TCGA-50-6592	LUAD	0.499543
TCGA-62-8398	LUAD	0.2164
TCGA-98-8021	LUSC	0.265663
TCGA-98-A53D	LUSC	0.536453
TCGA-91-6828	LUAD	0.295857
TCGA-05-4389	LUAD	0.336176
TCGA-17-Z006	LUAD	0.268788
TCGA-17-Z025	LUAD	0.34301
TCGA-17-Z031	LUAD	0.0569622
TCGA-17-Z052	LUAD	0.633368
TCGA-LA-A7SW	LUSC	0.370408
TCGA-MF-A522	LUSC	0.166211
TCGA-17-Z061	LUAD	0.0198674
TCGA-49-4488	LUAD	0.23271
TCGA-NC-A5HF	LUSC	0.0938947
TCGA-NC-A5HM	LUSC	0.318915
TCGA-NC-A5HQ	LUSC	0.295436
TCGA-91-7771	LUAD	0.290921
TCGA-O2-A52N	LUSC	0.224931
TCGA-17-Z001	LUAD	0.408203
TCGA-17-Z017	LUAD	0.249432
TCGA-17-Z021	LUAD	0.678573
TCGA-17-Z039	LUAD	0.442659
TCGA-17-Z040	LUAD	0.321971
TCGA-NJ-A7XG	LUAD	0.122267
TCGA-17-Z009	LUAD	0.73441
TCGA-17-Z011	LUAD	0.250356
TCGA-17-Z030	LUAD	0.627643
TCGA-50-5072	LUAD	0.32159
TCGA-50-5933	LUAD	0.365416
TCGA-50-5941	LUAD	0.44653
TCGA-50-5944	LUAD	0.102436
TCGA-50-8460	LUAD	0.354412
TCGA-18-3410	LUSC	0.106935
TCGA-22-1016	LUSC	0.302886
TCGA-22-4596	LUSC	0.449434
TCGA-22-4601	LUSC	0.108186
TCGA-22-5473	LUSC	0.13509
TCGA-22-5477	LUSC	0.0876263
TCGA-22-A5C4	LUSC	0.185345
TCGA-33-6738	LUSC	0.353625
TCGA-34-2600	LUSC	0.0802567
TCGA-34-2608	LUSC	0.411088
TCGA-34-5231	LUSC	0.145935
TCGA-34-5929	LUSC	0.15011
TCGA-17-Z000	LUAD	0.213512
TCGA-37-4130	LUSC	0.349493
TCGA-37-A5EM	LUSC	0.295215
TCGA-17-Z002	LUAD	0.260145
TCGA-39-5031	LUSC	0.336271
TCGA-43-7657	LUSC	0.235262
TCGA-17-Z003	LUAD	0.418352
TCGA-17-Z007	LUAD	0.298962
TCGA-46-3766	LUSC	0.458006
TCGA-46-3767	LUSC	0.369949
TCGA-46-6026	LUSC	0.0460388
TCGA-17-Z008	LUAD	0.176401
TCGA-17-Z023	LUAD	0.473914
TCGA-17-Z028	LUAD	0.331991
TCGA-17-Z029	LUAD	0.505742
TCGA-17-Z042	LUAD	0.43273
TCGA-17-Z043	LUAD	0.337772
TCGA-17-Z044	LUAD	0.360785
TCGA-17-Z049	LUAD	0.0987118
TCGA-51-4079	LUSC	0.762807
TCGA-52-7622	LUSC	0.405701
TCGA-17-Z051	LUAD	0.0916399
TCGA-17-Z058	LUAD	0.0398275
TCGA-50-5051	LUAD	0.20476
TCGA-91-6840	LUAD	0.186048
TCGA-91-6848	LUAD	0.368567
TCGA-17-Z018	LUAD	0.537311
TCGA-17-Z019	LUAD	0.304065
TCGA-17-Z027	LUAD	0.0510866
TCGA-56-5898	LUSC	0.265498
TCGA-56-8309	LUSC	0.509404
TCGA-58-8388	LUSC	0.167644
TCGA-60-2703	LUSC	0.531254
TCGA-60-2709	LUSC	0.523544
TCGA-17-Z035	LUAD	0.213633
TCGA-17-Z046	LUAD	0.280367
TCGA-63-A5MB	LUSC	0.143823
TCGA-17-Z060	LUAD	0.387345
TCGA-17-Z062	LUAD	0.619119
TCGA-66-2780	LUSC	0.371659
TCGA-66-2786	LUSC	0.254592
TCGA-66-2788	LUSC	0.442615
TCGA-66-2790	LUSC	0.236558
TCGA-44-8120	LUAD	0.285752
TCGA-62-8397	LUAD	0.125877
TCGA-68-8250	LUSC	0.282355
TCGA-68-A59J	LUSC	0.267991
TCGA-91-6829	LUAD	0.226545
TCGA-91-8499	LUAD	0.136857
TCGA-97-8174	LUAD	0.271938
TCGA-97-8176	LUAD	0.30361
TCGA-17-Z012	LUAD	0.550411
TCGA-77-8139	LUSC	0.362188
TCGA-77-A5G1	LUSC	0.559337
TCGA-77-A5G7	LUSC	0.398768
TCGA-77-A5GH	LUSC	0.441199
TCGA-17-Z036	LUAD	0.377781
TCGA-17-Z056	LUAD	0.86298
TCGA-44-8117	LUAD	0.152012
TCGA-50-6595	LUAD	0.514765
TCGA-62-8394	LUAD	0.206656
TCGA-62-A46Y	LUAD	0.320683
TCGA-85-8352	LUSC	0.0404723
TCGA-86-8076	LUAD	0.512386
TCGA-95-A4VN	LUAD	0.454917
TCGA-75-5122	LUAD	0.537361
TCGA-64-5781	LUAD	0.411735
TCGA-90-7964	LUSC	0.173376
TCGA-91-A4BD	LUAD	0.260044
TCGA-50-6590	LUAD	0.480646
TCGA-05-4422	LUAD	0.32198
TCGA-44-7672	LUAD	0.521925
TCGA-49-AAR3	LUAD	0.545492
TCGA-83-5908	LUAD	0.437585
TCGA-94-8035	LUSC	0.439793
TCGA-94-8490	LUSC	0.126381
TCGA-MP-A4TH	LUAD	0.394304
TCGA-49-AARR	LUAD	0.378259
TCGA-05-4418	LUAD	0.437817
TCGA-98-8022	LUSC	0.223761
TCGA-98-A53C	LUSC	0.517757
TCGA-44-6778	LUAD	0.389842
TCGA-L3-A524	LUSC	0.178869
TCGA-35-4123	LUAD	0.514542
TCGA-86-A456	LUAD	0.350796
TCGA-55-7911	LUAD	0.416744
TCGA-95-7944	LUAD	0.464105
TCGA-49-AARN	LUAD	0.362703
TCGA-55-6971	LUAD	0.434558
TCGA-NC-A5HD	LUSC	0.252928
TCGA-NC-A5HJ	LUSC	0.378468
TCGA-86-8056	LUAD	0.269073
TCGA-NK-A5CX	LUSC	0.416438
TCGA-NK-A7XE	LUSC	0.476348
TCGA-55-8089	LUAD	0.52071
TCGA-69-7761	LUAD	0.468105
TCGA-99-AA5R	LUAD	0.415893
TCGA-67-6217	LUAD	0.348092
TCGA-44-2668	LUAD	0.621062
TCGA-50-5946	LUAD	0.0683258
TCGA-91-A4BC	LUAD	0.490601
TCGA-86-7954	LUAD	0.394354
TCGA-18-3415	LUSC	0.0786952
TCGA-21-1081	LUSC	0.0473316
TCGA-21-5784	LUSC	0.479272
TCGA-21-5787	LUSC	0.338385
TCGA-33-AASD	LUSC	0.0993927
TCGA-34-5927	LUSC	0.148519
TCGA-34-7107	LUSC	0.137384
TCGA-34-8454	LUSC	0.398695
TCGA-37-4129	LUSC	0.0381439
TCGA-37-4132	LUSC	0.749133
TCGA-37-A5EN	LUSC	0.278837
TCGA-73-4677	LUAD	0.175736
TCGA-39-5030	LUSC	0.532636
TCGA-43-8115	LUSC	0.410423
TCGA-43-A474	LUSC	0.146801
TCGA-43-A56U	LUSC	0.635913
TCGA-95-A4VK	LUAD	0.306294
TCGA-55-6968	LUAD	0.311301
TCGA-86-8075	LUAD	0.27326
TCGA-97-7553	LUAD	0.412698
TCGA-L9-A444	LUAD	0.412882
TCGA-MP-A4TJ	LUAD	0.509913
TCGA-L9-A743	LUAD	0.50433
TCGA-44-5643	LUAD	0.404381
TCGA-78-7542	LUAD	0.338636
TCGA-73-4676	LUAD	0.188101
TCGA-69-8255	LUAD	0.422948
TCGA-50-5055	LUAD	0.617936
TCGA-50-5068	LUAD	0.475863
TCGA-49-6761	LUAD	0.366213
TCGA-95-7567	LUAD	0.265351
TCGA-56-7579	LUSC	0.322308
TCGA-56-8083	LUSC	0.0194947
TCGA-56-8201	LUSC	0.51
TCGA-56-8304	LUSC	0.389583
TCGA-56-8623	LUSC	0.398299
TCGA-56-A4BW	LUSC	0.281347
TCGA-58-8390	LUSC	0.131462
TCGA-58-A46J	LUSC	0.455255
TCGA-58-A46K	LUSC	0.324571
TCGA-60-2695	LUSC	0.123348
TCGA-78-7536	LUAD	0.136024
TCGA-53-7813	LUAD	0.374193
TCGA-63-5131	LUSC	0.237612
TCGA-63-A5MU	LUSC	0.0958018
TCGA-63-A5MY	LUSC	0.146788
TCGA-44-6148	LUAD	0.177418
TCGA-49-6767	LUAD	0.348569
TCGA-L9-A7SV	LUAD	0.0874234
TCGA-66-2789	LUSC	0.0832472
TCGA-55-6985	LUAD	0.402649
TCGA-L9-A8F4	LUAD	0.462728
TCGA-49-AAR2	LUAD	0.274197
TCGA-75-6212	LUAD	0.351746
TCGA-86-6851	LUAD	0.444778
TCGA-50-7109	LUAD	0.286207
TCGA-77-8146	LUSC	0.31025
TCGA-77-8148	LUSC	0.187718
TCGA-50-5939	LUAD	0.450484
TCGA-44-3919	LUAD	0.33971
TCGA-97-7547	LUAD	0.209713
TCGA-55-8203	LUAD	0.331952
TCGA-85-8287	LUSC	0.444807
TCGA-85-A53L	LUSC	0.476173
TCGA-49-6744	LUAD	0.442277
TCGA-55-8097	LUAD	0.186083
TCGA-50-5066	LUAD	0.275078
TCGA-35-4122	LUAD	0.435623
TCGA-80-5607	LUAD	0.307169
TCGA-69-7974	LUAD	0.319967
TCGA-90-7766	LUSC	0.376381
TCGA-90-7769	LUSC	0.16415
TCGA-NJ-A4YQ	LUAD	0.534274
TCGA-55-7907	LUAD	0.299867
TCGA-93-A4JN	LUAD	0.304684
TCGA-92-7340	LUSC	0.403747
TCGA-67-3773	LUAD	0.185077
TCGA-94-A4VJ	LUSC	0.215095
TCGA-86-7955	LUAD	0.116302
TCGA-95-7948	LUAD	0.112548
TCGA-4B-A93V	LUAD	0.244927
TCGA-69-7978	LUAD	0.491266
TCGA-05-4432	LUAD	0.346039
TCGA-55-6969	LUAD	0.491108
TCGA-49-4507	LUAD	0.438485
TCGA-93-A4JO	LUAD	0.493245
TCGA-MP-A4TD	LUAD	0.326814
TCGA-93-A4JQ	LUAD	0.511194
TCGA-97-A4M2	LUAD	0.436969
TCGA-MP-A4T6	LUAD	0.203721
TCGA-75-6205	LUAD	0.587876
TCGA-MP-A4T4	LUAD	0.504197
TCGA-86-8073	LUAD	0.324003
TCGA-78-7147	LUAD	0.17666
TCGA-80-5611	LUAD	0.328183
TCGA-67-3774	LUAD	0.27448
TCGA-55-6987	LUAD	0.610384
TCGA-55-6984	LUAD	0.359703
TCGA-21-1080	LUSC	0.0757459
TCGA-22-4593	LUSC	0.133007
TCGA-22-4594	LUSC	0.435828
TCGA-22-4595	LUSC	0.353603
TCGA-22-4607	LUSC	0.186117
TCGA-22-4613	LUSC	0.333079
TCGA-22-5472	LUSC	0.205271
TCGA-33-4583	LUSC	0.249406
TCGA-33-A4WN	LUSC	0.429707
TCGA-34-2609	LUSC	0.324893
TCGA-34-5232	LUSC	0.568215
TCGA-37-3789	LUSC	0.0584994
TCGA-37-3792	LUSC	0.374928
TCGA-37-A5EL	LUSC	0.0850731
TCGA-86-8055	LUAD	0.310279
TCGA-44-2657	LUAD	0.523987
TCGA-99-8033	LUAD	0.402545
TCGA-39-5019	LUSC	0.355213
TCGA-39-5039	LUSC	0.378778
TCGA-43-3394	LUSC	0.0400621
TCGA-NJ-A55A	LUAD	0.368777
TCGA-55-8204	LUAD	0.399943
TCGA-75-5146	LUAD	0.270856
TCGA-46-3768	LUSC	0.0423611
TCGA-64-5778	LUAD	0.31632
TCGA-86-A4P8	LUAD	0.399092
TCGA-55-6642	LUAD	0.369819
TCGA-44-6775	LUAD	0.465366
TCGA-55-8208	LUAD	0.526583
TCGA-78-7155	LUAD	0.107861
TCGA-78-7152	LUAD	0.315427
TCGA-51-4081	LUSC	0.0378369
TCGA-52-7810	LUSC	0.233609
TCGA-55-8092	LUAD	0.362987
TCGA-MP-A4T9	LUAD	0.384136
TCGA-86-7701	LUAD	0.369573
TCGA-78-8655	LUAD	0.226649
TCGA-49-4494	LUAD	0.304768
TCGA-55-7914	LUAD	0.329963
TCGA-NJ-A4YI	LUAD	0.175491
TCGA-55-8616	LUAD	0.289043
TCGA-56-5897	LUSC	0.470764
TCGA-56-6546	LUSC	0.451105
TCGA-56-7221	LUSC	0.163674
TCGA-56-7582	LUSC	0.130577
TCGA-56-8305	LUSC	0.29785
TCGA-56-8622	LUSC	0.302376
TCGA-56-8624	LUSC	0.281852
TCGA-56-A4ZJ	LUSC	0.39128
TCGA-56-A4ZK	LUSC	0.376849
TCGA-58-8391	LUSC	0.176843
TCGA-60-2707	LUSC	0.0277335
TCGA-60-2713	LUSC	0.0383499
TCGA-86-8281	LUAD	0.275774
TCGA-86-8669	LUAD	0.197905
TCGA-63-7022	LUSC	0.527266
TCGA-63-A5MM	LUSC	0.449481
TCGA-97-7554	LUAD	0.266182
TCGA-66-2792	LUSC	0.0969789
TCGA-66-2795	LUSC	0.1836
TCGA-L4-A4E5	LUAD	0.228805
TCGA-97-8175	LUAD	0.358448
TCGA-J2-A4AG	LUAD	0.479429
TCGA-69-7764	LUAD	0.162911
TCGA-95-7562	LUAD	0.201976
TCGA-44-4112	LUAD	0.391419
TCGA-49-AAQV	LUAD	0.500739
TCGA-73-4658	LUAD	0.388599
TCGA-MP-A4SW	LUAD	0.389075
TCGA-35-5375	LUAD	0.193749
TCGA-77-7140	LUSC	0.0836233
TCGA-77-7142	LUSC	0.143154
TCGA-77-8008	LUSC	0.410775
TCGA-MP-A4TA	LUAD	0.577713
TCGA-69-8254	LUAD	0.282357
TCGA-05-4417	LUAD	0.355197
TCGA-62-A46R	LUAD	0.315831
TCGA-85-7698	LUSC	0.246777
TCGA-85-7699	LUSC	0.324915
TCGA-85-8048	LUSC	0.559425
TCGA-85-8277	LUSC	0.208839
TCGA-85-8288	LUSC	0.268134
TCGA-85-8353	LUSC	0.397189
TCGA-85-8582	LUSC	0.461395
TCGA-85-8584	LUSC	0.456569
TCGA-86-8358	LUAD	0.102282
TCGA-L9-A50W	LUAD	0.154588
TCGA-44-2656	LUAD	0.441464
TCGA-64-5779	LUAD	0.32002
TCGA-55-6979	LUAD	0.467539
TCGA-44-5645	LUAD	0.357825
TCGA-49-4501	LUAD	0.293295
TCGA-69-8453	LUAD	0.341746
TCGA-LA-A446	LUSC	0.281146
TCGA-MP-A4TE	LUAD	0.204612
TCGA-NC-A5HL	LUSC	0.343186
TCGA-NC-A5HP	LUSC	0.104341
TCGA-44-6145	LUAD	0.492323
TCGA-O2-A52Q	LUSC	0.327926
TCGA-O2-A52S	LUSC	0.206121
TCGA-MP-A4SY	LUAD	0.278688
TCGA-97-7552	LUAD	0.485473
TCGA-49-6745	LUAD	0.33046
TCGA-44-7659	LUAD	0.191677
TCGA-86-8280	LUAD	0.305174
TCGA-95-7039	LUAD	0.194833
TCGA-95-8039	LUAD	0.293874
TCGA-18-3406	LUSC	0.337487
TCGA-18-3408	LUSC	0.144959
TCGA-18-5592	LUSC	0.137006
TCGA-21-1072	LUSC	0.0620719
TCGA-21-1079	LUSC	0.0592073
TCGA-22-4591	LUSC	0.0618979
TCGA-22-5482	LUSC	0.16063
TCGA-33-4538	LUSC	0.0510104
TCGA-33-4547	LUSC	0.0308212
TCGA-33-4582	LUSC	0.25624
TCGA-33-AASB	LUSC	0.283348
TCGA-33-AASI	LUSC	0.390221
TCGA-34-2605	LUSC	0.0358177
TCGA-75-7027	LUAD	0.162971
TCGA-37-3783	LUSC	0.42331
TCGA-37-4133	LUSC	0.0782629
TCGA-44-A479	LUAD	0.554133
TCGA-39-5022	LUSC	0.565689
TCGA-39-5034	LUSC	0.255308
TCGA-43-5668	LUSC	0.458449
TCGA-43-6647	LUSC	0.459401
TCGA-43-7658	LUSC	0.149452
TCGA-43-A56V	LUSC	0.373581
TCGA-05-4398	LUAD	0.286318
TCGA-38-4632	LUAD	0.314435
TCGA-67-6216	LUAD	0.331485
TCGA-55-6980	LUAD	0.379753
TCGA-62-A472	LUAD	0.280934
TCGA-55-8299	LUAD	0.539297
TCGA-55-7725	LUAD	0.260489
TCGA-44-A47A	LUAD	0.284285
TCGA-86-8585	LUAD	0.463755
TCGA-78-7163	LUAD	0.189799
TCGA-49-AAR0	LUAD	0.33529
TCGA-55-A493	LUAD	0.529251
TCGA-62-A471	LUAD	0.281888
TCGA-51-4080	LUSC	0.0158328
TCGA-75-6214	LUAD	0.223069
TCGA-67-3771	LUAD	0.349555
TCGA-78-7148	LUAD	0.157546
TCGA-J2-A4AE	LUAD	0.254953
TCGA-55-6970	LUAD	0.321536
TCGA-L4-A4E6	LUAD	0.43669
TCGA-86-8074	LUAD	0.184861
TCGA-49-4514	LUAD	0.487476
TCGA-55-8301	LUAD	0.486923
TCGA-55-8205	LUAD	0.453479
TCGA-MP-A4TI	LUAD	0.508272
TCGA-35-3615	LUAD	0.184525
TCGA-56-1622	LUSC	0.0286649
TCGA-56-8503	LUSC	0.565728
TCGA-56-8626	LUSC	0.254481
TCGA-56-8628	LUSC	0.323966
TCGA-58-8386	LUSC	0.338965
TCGA-60-2704	LUSC	0.481305
TCGA-60-2708	LUSC	0.160536
TCGA-60-2720	LUSC	0.410402
TCGA-49-4506	LUAD	0.587712
TCGA-63-6202	LUSC	0.384263
TCGA-63-A5MI	LUSC	0.271288
TCGA-NJ-A4YF	LUAD	0.232181
TCGA-49-AARO	LUAD	0.394894
TCGA-66-2744	LUSC	0.374178
TCGA-66-2763	LUSC	0.220776
TCGA-68-7755	LUSC	0.148944
TCGA-73-4670	LUAD	0.181372
TCGA-69-8253	LUAD	0.223787
TCGA-55-7726	LUAD	0.267889
TCGA-05-4427	LUAD	0.196915
TCGA-77-7335	LUSC	0.349854
TCGA-77-8128	LUSC	0.112762
TCGA-77-8131	LUSC	0.574684
TCGA-77-8138	LUSC	0.343348
TCGA-77-8143	LUSC	0.168516
TCGA-77-8150	LUSC	0.218256
TCGA-49-6742	LUAD	0.18455
TCGA-55-8508	LUAD	0.404283
TCGA-85-6175	LUSC	0.304106
TCGA-85-8049	LUSC	0.477193
TCGA-85-A512	LUSC	0.151887
TCGA-85-A5B5	LUSC	0.0716063
TCGA-44-3396	LUAD	0.565021
TCGA-69-7980	LUAD	0.198469
TCGA-55-8510	LUAD	0.410543
TCGA-92-8063	LUSC	0.357616
TCGA-94-7557	LUSC	0.335559
TCGA-NJ-A4YG	LUAD	0.338028
TCGA-86-8673	LUAD	0.362458
TCGA-NJ-A4YP	LUAD	0.327973
TCGA-64-5774	LUAD	0.150211
TCGA-O1-A52J	LUAD	0.283192
TCGA-98-7454	LUSC	0.513708
TCGA-MP-A4T8	LUAD	0.169011
TCGA-L3-A4E7	LUSC	0.452346
TCGA-55-8621	LUAD	0.411316
TCGA-NC-A5HK	LUSC	0.207994
TCGA-75-7031	LUAD	0.273798
TCGA-49-AARQ	LUAD	0.245454
TCGA-53-7624	LUAD	0.177641
TCGA-67-3772	LUAD	0.367486
TCGA-49-4490	LUAD	0.351666
TCGA-44-3918	LUAD	0.377989
TCGA-MP-A4TC	LUAD	0.370633
TCGA-44-2659	LUAD	NA
TCGA-78-7160	LUAD	0.431732
TCGA-55-7995	LUAD	0.3483
TCGA-73-4662	LUAD	0.301014
TCGA-50-8459	LUAD	0.377336
TCGA-18-3411	LUSC	0.148829
TCGA-18-3416	LUSC	0.272733
TCGA-21-5786	LUSC	0.231771
TCGA-22-1011	LUSC	0.483668
TCGA-22-1012	LUSC	0.834843
TCGA-33-4586	LUSC	0.385213
TCGA-33-AASJ	LUSC	0.205562
TCGA-86-7953	LUAD	0.424445
TCGA-78-8662	LUAD	0.0838214
TCGA-39-5016	LUSC	0.271814
TCGA-39-5021	LUSC	0.475936
TCGA-39-5024	LUSC	0.482286
TCGA-39-5027	LUSC	0.217741
TCGA-39-5028	LUSC	0.414591
TCGA-39-5035	LUSC	0.329595
TCGA-39-5036	LUSC	0.231912
TCGA-43-5670	LUSC	0.31076
TCGA-43-6143	LUSC	0.0380369
TCGA-43-7656	LUSC	0.366967
TCGA-43-8116	LUSC	0.361303
TCGA-73-7499	LUAD	0.323129
TCGA-64-1676	LUAD	0.398987
TCGA-75-7030	LUAD	0.386117
TCGA-46-3769	LUSC	0.134304
TCGA-38-6178	LUAD	0.309406
TCGA-73-4666	LUAD	0.334216
TCGA-05-4382	LUAD	0.460245
TCGA-53-A4EZ	LUAD	0.316972
TCGA-55-7227	LUAD	0.258085
TCGA-73-7498	LUAD	0.181805
TCGA-MP-A5C7	LUAD	0.067335
TCGA-55-7281	LUAD	0.320708
TCGA-49-AARE	LUAD	0.289299
TCGA-55-5899	LUAD	0.1809
TCGA-44-7671	LUAD	0.0973799
TCGA-55-6986	LUAD	0.312024
TCGA-MP-A4TF	LUAD	0.360278
TCGA-69-A59K	LUAD	0.312919
TCGA-97-A4LX	LUAD	0.552084
TCGA-86-8671	LUAD	0.56959
TCGA-49-4487	LUAD	0.521789
TCGA-38-A44F	LUAD	0.399931
TCGA-56-6545	LUSC	0.371616
TCGA-56-7822	LUSC	0.315878
TCGA-56-8082	LUSC	0.160965
TCGA-56-8625	LUSC	0.431359
TCGA-56-A49D	LUSC	0.345706
TCGA-56-A5DR	LUSC	0.30237
TCGA-58-A46N	LUSC	0.104323
TCGA-60-2698	LUSC	0.285527
TCGA-60-2719	LUSC	0.185181
TCGA-63-7021	LUSC	0.513352
TCGA-63-7023	LUSC	0.137881
TCGA-63-A5MP	LUSC	0.385614
TCGA-66-2755	LUSC	0.396114
TCGA-66-2768	LUSC	0.351609
TCGA-66-2771	LUSC	0.450076
TCGA-66-2782	LUSC	0.371221
TCGA-66-2794	LUSC	0.0743802
TCGA-55-7570	LUAD	0.325854
TCGA-68-7757	LUSC	0.436259
TCGA-6A-AB49	LUSC	0.11673
TCGA-55-6978	LUAD	0.495882
TCGA-NJ-A55R	LUAD	0.345369
TCGA-77-7139	LUSC	0.138052
TCGA-77-7141	LUSC	0.181565
TCGA-77-7338	LUSC	0.323768
TCGA-77-8130	LUSC	0.263714
TCGA-77-8154	LUSC	0.19331
TCGA-79-5596	LUSC	0.268325
TCGA-55-1594	LUAD	0.229643
TCGA-85-6560	LUSC	0.247099
TCGA-85-7697	LUSC	0.480713
TCGA-85-A4CN	LUSC	0.311061
TCGA-85-A4JB	LUSC	0.415508
TCGA-85-A4QQ	LUSC	0.257747
TCGA-85-A50M	LUSC	0.436559
TCGA-90-6837	LUSC	0.230614
TCGA-92-8065	LUSC	0.393946
TCGA-94-8491	LUSC	0.316412
TCGA-75-5147	LUAD	0.306669
TCGA-38-4625	LUAD	0.312425
TCGA-78-7537	LUAD	0.122849
TCGA-44-7670	LUAD	0.176466
TCGA-69-7765	LUAD	0.352871
TCGA-55-8085	LUAD	0.315255
TCGA-98-8020	LUSC	0.272515
TCGA-98-A53H	LUSC	0.551731
TCGA-98-A53J	LUSC	0.354129
TCGA-78-7220	LUAD	0.162519
TCGA-97-A4M3	LUAD	0.130271
TCGA-49-4505	LUAD	0.288165
TCGA-80-5608	LUAD	0.25635
TCGA-97-A4M5	LUAD	0.30154
TCGA-55-8511	LUAD	0.457748
TCGA-NC-A5HO	LUSC	0.329645
TCGA-NC-A5HR	LUSC	0.300829
TCGA-05-4424	LUAD	0.3262
TCGA-O2-A52V	LUSC	0.472811
TCGA-O2-A5IB	LUSC	0.0438383
TCGA-55-8087	LUAD	0.0732822
TCGA-97-8172	LUAD	0.335549
TCGA-44-2665	LUAD	0.314653
TCGA-S2-AA1A	LUAD	0.419555
TCGA-MN-A4N5	LUAD	0.283358
TCGA-18-3412	LUSC	0.0744633
TCGA-21-1071	LUSC	0.420078
TCGA-22-1017	LUSC	0.28733
TCGA-22-5471	LUSC	0.319893
TCGA-33-4587	LUSC	0.0702947
TCGA-33-AAS8	LUSC	0.268608
TCGA-34-5241	LUSC	0.406592
TCGA-34-8455	LUSC	0.256017
TCGA-55-7283	LUAD	0.176558
TCGA-39-5040	LUSC	0.205353
TCGA-43-6773	LUSC	0.646556
TCGA-43-A475	LUSC	0.476607
TCGA-93-8067	LUAD	0.266696
TCGA-J2-A4AD	LUAD	0.231672
TCGA-55-7576	LUAD	0.22629
TCGA-38-4631	LUAD	0.310961
TCGA-55-7815	LUAD	0.412693
TCGA-93-A4JP	LUAD	0.260141
TCGA-44-6777	LUAD	0.435166
TCGA-46-3765	LUSC	0.788815
TCGA-50-6597	LUAD	0.274502
TCGA-50-8457	LUAD	0.331844
TCGA-69-7760	LUAD	0.11622
TCGA-97-8179	LUAD	0.116845
TCGA-38-4627	LUAD	0.336047
TCGA-55-8507	LUAD	0.163686
TCGA-44-A4SU	LUAD	0.293664
TCGA-78-7540	LUAD	0.131993
TCGA-73-A9RS	LUAD	0.193126
TCGA-49-4510	LUAD	0.131529
TCGA-99-8028	LUAD	0.512027
TCGA-73-4668	LUAD	0.220254
TCGA-55-8619	LUAD	0.512447
TCGA-86-A4JF	LUAD	0.354276
TCGA-44-3917	LUAD	0.364403
TCGA-55-7573	LUAD	0.289832
TCGA-53-7626	LUAD	0.378273
TCGA-56-7823	LUSC	0.0744003
TCGA-56-A4BX	LUSC	0.0571574
TCGA-56-A5DS	LUSC	0.536961
TCGA-58-A46M	LUSC	0.228091
TCGA-60-2714	LUSC	0.747301
TCGA-60-2722	LUSC	0.026342
TCGA-50-5942	LUAD	0.140457
TCGA-50-5045	LUAD	0.467013
TCGA-63-A5MR	LUSC	0.440645
TCGA-55-8090	LUAD	0.213097
TCGA-66-2758	LUSC	0.236166
TCGA-78-7539	LUAD	0.268871
TCGA-68-8251	LUSC	0.427343
TCGA-99-8025	LUAD	0.199753
TCGA-MP-A4SV	LUAD	0.383987
TCGA-78-7150	LUAD	0.185561
TCGA-97-A4M1	LUAD	0.173137
TCGA-77-6844	LUSC	0.215543
TCGA-77-8156	LUSC	0.545362
TCGA-77-A5G8	LUSC	0.333483
TCGA-86-8674	LUAD	0.285843
TCGA-MN-A4N4	LUAD	0.279447
TCGA-55-7910	LUAD	0.209257
TCGA-78-7153	LUAD	0.168491
TCGA-MP-A4T7	LUAD	0.263226
TCGA-MP-A4T2	LUAD	0.229217
TCGA-44-5644	LUAD	0.112803
TCGA-78-7535	LUAD	0.236498
TCGA-85-6798	LUSC	0.219461
TCGA-85-7696	LUSC	0.15619
TCGA-85-7844	LUSC	0.336156
TCGA-85-8070	LUSC	0.0639309
TCGA-85-A4JC	LUSC	0.570218
TCGA-85-A4QR	LUSC	0.105702
TCGA-85-A513	LUSC	0.468277
TCGA-86-7711	LUAD	0.550371
TCGA-97-8171	LUAD	0.0308607
TCGA-78-7158	LUAD	0.0506267
TCGA-97-8552	LUAD	0.248435
TCGA-49-4512	LUAD	0.263829
TCGA-95-7947	LUAD	0.211269
TCGA-44-A47G	LUAD	0.569527
TCGA-86-8668	LUAD	0.243743
TCGA-94-7943	LUSC	0.198534
TCGA-93-7347	LUAD	0.490248
TCGA-44-2666	LUAD	0.208032
TCGA-55-A4DF	LUAD	0.331283
TCGA-96-7544	LUSC	0.320783
TCGA-96-A4JL	LUSC	0.401926
TCGA-50-6594	LUAD	0.174477
TCGA-05-4244	LUAD	0.246926
TCGA-L9-A443	LUAD	0.163678
TCGA-98-8023	LUSC	0.450679
TCGA-55-A48X	LUAD	0.460256
TCGA-97-7546	LUAD	0.277076
TCGA-67-4679	LUAD	0.154595
TCGA-78-8660	LUAD	0.462099
TCGA-55-7816	LUAD	0.347717
TCGA-NK-A5CR	LUSC	0.151084
TCGA-NK-A5CT	LUSC	0.478377
TCGA-XC-AA0X	LUSC	0.478406
TCGA-44-7662	LUAD	0.328807
TCGA-78-7154	LUAD	0.165184
TCGA-55-7728	LUAD	0.367101
TCGA-97-8177	LUAD	0.395711
TCGA-67-6215	LUAD	0.149603
TCGA-55-1595	LUAD	0.217166
TCGA-55-A491	LUAD	0.325772
TCGA-49-6743	LUAD	0.450274
TCGA-50-6593	LUAD	0.288504
TCGA-55-8620	LUAD	0.215306
TCGA-78-7633	LUAD	0.0601323
TCGA-99-7458	LUAD	0.329517
TCGA-05-4250	LUAD	0.238785
TCGA-86-A4P7	LUAD	0.407103
TCGA-55-8506	LUAD	0.246189
TCGA-05-4433	LUAD	0.280133
TCGA-38-4626	LUAD	0.44158
TCGA-18-4086	LUSC	0.280096
TCGA-21-1076	LUSC	0.473299
TCGA-22-0944	LUSC	0.0801873
TCGA-22-1002	LUSC	0.308619
TCGA-22-5474	LUSC	0.370464
TCGA-22-5480	LUSC	0.219466
TCGA-22-5481	LUSC	0.138737
TCGA-22-5483	LUSC	0.11177
TCGA-22-5491	LUSC	0.150315
TCGA-33-4533	LUSC	0.212527
TCGA-75-5125	LUAD	0.368868
TCGA-37-5819	LUSC	0.138088
TCGA-J2-8194	LUAD	0.250183
TCGA-43-3920	LUSC	0.0698493
TCGA-44-6774	LUAD	0.375201
TCGA-55-7574	LUAD	0.508642
TCGA-44-2655	LUAD	0.394397
TCGA-55-A490	LUAD	0.216741
TCGA-99-8032	LUAD	0.312386
TCGA-78-7149	LUAD	0.133778
TCGA-62-A46S	LUAD	0.236343
TCGA-64-1678	LUAD	0.241163
TCGA-62-A46O	LUAD	0.081542
TCGA-55-A4DG	LUAD	0.276732
TCGA-75-6207	LUAD	0.153495
TCGA-97-A4M0	LUAD	0.215143
TCGA-86-8279	LUAD	0.177842
TCGA-55-8302	LUAD	0.308551
TCGA-52-7811	LUSC	0.380212
TCGA-52-7812	LUSC	0.36016
TCGA-62-A46U	LUAD	0.423774
TCGA-67-3770	LUAD	NA
TCGA-55-6543	LUAD	0.187906
TCGA-75-5126	LUAD	0.47382
TCGA-64-1680	LUAD	0.147831
TCGA-05-4249	LUAD	0.251681
TCGA-55-7724	LUAD	0.393258
TCGA-97-7941	LUAD	0.227724
TCGA-56-7731	LUSC	0.508792
TCGA-56-8629	LUSC	0.168098
TCGA-58-8393	LUSC	0.410424
TCGA-60-2711	LUSC	0.811192
TCGA-60-2726	LUSC	0.267829
TCGA-63-A5ML	LUSC	0.119256
TCGA-66-2753	LUSC	0.233879
TCGA-66-2756	LUSC	0.0612621
TCGA-66-2759	LUSC	0.0729785
TCGA-66-2765	LUSC	0.31167
TCGA-66-2769	LUSC	0.0322354
TCGA-66-2787	LUSC	0.336794
TCGA-NJ-A55O	LUAD	0.279332
TCGA-68-A59I	LUSC	0.519591
TCGA-64-1679	LUAD	0.33551
TCGA-05-4426	LUAD	0.226346
TCGA-MP-A4TK	LUAD	0.334534
TCGA-55-7727	LUAD	0.290876
TCGA-05-4420	LUAD	0.204151
TCGA-77-6842	LUSC	0.352541
TCGA-77-7138	LUSC	0.486153
TCGA-77-8007	LUSC	0.594925
TCGA-77-8153	LUSC	0.225419
TCGA-78-7146	LUAD	0.155634
TCGA-78-7156	LUAD	0.0486691
TCGA-55-7913	LUAD	0.497364
TCGA-55-1592	LUAD	0.231461
TCGA-85-8276	LUSC	0.425825
TCGA-85-8666	LUSC	0.457082
TCGA-44-A4SS	LUAD	0.516417
TCGA-55-8091	LUAD	0.261419
TCGA-90-A59Q	LUSC	0.489121
TCGA-50-6591	LUAD	0.0574123
TCGA-55-8614	LUAD	0.256871
TCGA-95-A4VP	LUAD	0.407342
TCGA-55-8615	LUAD	0.180602
TCGA-75-7025	LUAD	0.269911
TCGA-86-7713	LUAD	0.12889
TCGA-50-6673	LUAD	0.286284
TCGA-NC-A5HE	LUSC	0.523451
TCGA-NC-A5HI	LUSC	0.359134
TCGA-NC-A5HN	LUSC	0.0974974
TCGA-49-AAR4	LUAD	0.587917
TCGA-86-8672	LUAD	0.418386
TCGA-05-4397	LUAD	0.144997
TCGA-86-A4D0	LUAD	0.146812
TCGA-97-A4M6	LUAD	0.363205
TCGA-44-7660	LUAD	0.212074
TCGA-64-1677	LUAD	0.477485
TCGA-J2-8192	LUAD	0.318307
TCGA-MN-A4N1	LUAD	0.158387
TCGA-05-4430	LUAD	0.295727
TCGA-18-3417	LUSC	0.280626
TCGA-18-4721	LUSC	0.438949
TCGA-21-1075	LUSC	0.0540731
TCGA-22-4599	LUSC	0.312949
TCGA-22-4609	LUSC	0.387203
TCGA-22-5479	LUSC	0.34292
TCGA-33-4589	LUSC	0.522967
TCGA-33-A5GW	LUSC	0.100282
TCGA-33-AASL	LUSC	0.49542
TCGA-34-2604	LUSC	0.435793
TCGA-37-4135	LUSC	0.0297978
TCGA-39-5011	LUSC	0.503796
TCGA-39-5029	LUSC	0.319673
TCGA-39-5037	LUSC	0.217212
TCGA-43-6771	LUSC	0.36732
TCGA-86-8278	LUAD	0.295999
TCGA-97-A4M7	LUAD	0.409631
TCGA-86-8359	LUAD	0.338175
TCGA-86-7714	LUAD	0.214316
TCGA-97-7937	LUAD	0.187472
TCGA-55-A48Y	LUAD	0.413317
TCGA-64-5775	LUAD	0.145016
TCGA-64-1681	LUAD	0.294435
TCGA-46-6025	LUSC	0.144823
TCGA-55-A57B	LUAD	0.272613
TCGA-78-7166	LUAD	0.247767
TCGA-52-7809	LUSC	0.253642
TCGA-78-7159	LUAD	0.300493
TCGA-62-A46V	LUAD	0.218921
TCGA-69-7763	LUAD	0.227251
TCGA-78-7167	LUAD	0.0500679
TCGA-50-5931	LUAD	0.0836685
TCGA-55-6983	LUAD	0.380756
TCGA-97-7938	LUAD	0.218783
TCGA-55-1596	LUAD	0.233687
TCGA-78-7145	LUAD	0.116128
TCGA-44-7669	LUAD	0.215278
TCGA-69-7973	LUAD	0.188759
TCGA-56-7223	LUSC	0.0427909
TCGA-56-7580	LUSC	0.376133
TCGA-56-A62T	LUSC	0.196119
TCGA-58-8387	LUSC	0.461174
TCGA-60-2706	LUSC	0.0568409
TCGA-60-2710	LUSC	0.182344
TCGA-60-2723	LUSC	0.732661
TCGA-73-4675	LUAD	0.133261
TCGA-71-8520	LUAD	0.149931
TCGA-95-7043	LUAD	0.105467
TCGA-63-5128	LUSC	0.0994412
TCGA-63-A5MG	LUSC	0.556005
TCGA-63-A5MH	LUSC	0.116483
TCGA-55-7903	LUAD	0.262008
TCGA-66-2727	LUSC	0.208793
TCGA-66-2766	LUSC	0.0306822
TCGA-66-2773	LUSC	0.314263
TCGA-66-2778	LUSC	0.526159
TCGA-44-6144	LUAD	0.270418
TCGA-68-7756	LUSC	0.33121
TCGA-44-6776	LUAD	0.0852466
TCGA-55-8206	LUAD	0.264924
TCGA-44-6779	LUAD	0.390884
TCGA-75-6206	LUAD	0.122679
TCGA-55-8096	LUAD	0.360569
TCGA-77-7463	LUSC	0.28624
TCGA-77-8145	LUSC	0.253076
TCGA-77-A5G6	LUSC	0.16428
TCGA-55-7994	LUAD	0.315335
TCGA-95-8494	LUAD	0.214786
TCGA-55-8094	LUAD	0.0643293
TCGA-85-7710	LUSC	0.191459
TCGA-85-7843	LUSC	0.283648
TCGA-85-7950	LUSC	0.279536
TCGA-85-8052	LUSC	0.330337
TCGA-85-8355	LUSC	0.60044
TCGA-85-8580	LUSC	0.483765
TCGA-85-A4PA	LUSC	0.910951
TCGA-55-8207	LUAD	0.165437
TCGA-69-7979	LUAD	0.146615
TCGA-73-4659	LUAD	0.249554
TCGA-55-8505	LUAD	0.404155
TCGA-75-6211	LUAD	0.322395
TCGA-92-7341	LUSC	0.216818
TCGA-92-8064	LUSC	0.449849
TCGA-94-A5I6	LUSC	0.345684
TCGA-78-7161	LUAD	0.0618421
TCGA-96-8170	LUSC	0.378223
TCGA-55-6975	LUAD	0.364616
TCGA-50-5044	LUAD	0.412318
TCGA-98-A538	LUSC	0.348504
TCGA-98-A539	LUSC	0.380079
TCGA-98-A53A	LUSC	0.242025
TCGA-98-A53I	LUSC	0.364553
TCGA-05-4402	LUAD	0.285064
TCGA-J1-A4AH	LUSC	0.368918
TCGA-L9-A5IP	LUAD	0.296086
TCGA-55-6982	LUAD	0.33134
TCGA-NC-A5HG	LUSC	0.137298
TCGA-O2-A52W	LUSC	0.355487
TCGA-55-8514	LUAD	0.231814
TCGA-78-8648	LUAD	0.523066
TCGA-55-8512	LUAD	0.226482
TCGA-44-3398	LUAD	0.345959
TCGA-75-6203	LUAD	0.352845
TCGA-64-5815	LUAD	0.300375
TCGA-18-3407	LUSC	0.325946
TCGA-18-3414	LUSC	0.0624452
TCGA-18-3421	LUSC	0.19288
TCGA-18-4083	LUSC	0.0776437
TCGA-21-1082	LUSC	0.176283
TCGA-21-5782	LUSC	0.337587
TCGA-22-0940	LUSC	0.366703
TCGA-22-1000	LUSC	0.422469
TCGA-22-1005	LUSC	0.595405
TCGA-22-4605	LUSC	0.402233
TCGA-33-4532	LUSC	0.0632166
TCGA-33-4566	LUSC	0.270583
TCGA-34-5234	LUSC	0.488091
TCGA-34-5236	LUSC	0.3859
TCGA-34-5239	LUSC	0.307276
TCGA-43-2581	LUSC	0.397197
TCGA-43-8118	LUSC	0.355785
TCGA-49-4486	LUAD	0.0915776
TCGA-71-6725	LUAD	0.248399
TCGA-93-7348	LUAD	0.406562
TCGA-44-A47F	LUAD	0.217815
TCGA-55-A492	LUAD	0.134565
TCGA-55-A48Z	LUAD	0.276075
TCGA-55-6981	LUAD	0.394753
TCGA-44-A47B	LUAD	0.245822
TCGA-55-6972	LUAD	0.0172851
TCGA-44-6146	LUAD	0.165765
TCGA-49-AAR9	LUAD	0.164434
TCGA-38-4628	LUAD	0.152455
TCGA-51-6867	LUSC	0.176661
TCGA-05-4434	LUAD	0.38452
TCGA-78-8640	LUAD	0.339756
TCGA-44-2662	LUAD	0.535849
TCGA-05-4415	LUAD	0.176539
TCGA-86-8054	LUAD	0.112387
TCGA-05-4403	LUAD	0.255516
TCGA-55-7284	LUAD	0.228858
TCGA-44-8119	LUAD	0.151291
TCGA-62-A470	LUAD	0.170962
TCGA-38-7271	LUAD	0.556715
TCGA-86-6562	LUAD	0.19517
TCGA-55-8513	LUAD	0.365327
TCGA-56-7730	LUSC	0.0953718
TCGA-56-8307	LUSC	0.352896
TCGA-56-8308	LUSC	0.304973
TCGA-56-8504	LUSC	0.317675
TCGA-56-A4BY	LUSC	0.201456
TCGA-58-8392	LUSC	0.157673
TCGA-58-A46L	LUSC	0.31764
TCGA-60-2721	LUSC	0.0410919
TCGA-60-2725	LUSC	0.44338
TCGA-44-7667	LUAD	0.313921
TCGA-05-4405	LUAD	0.304389
TCGA-05-4395	LUAD	0.202137
TCGA-63-A5MT	LUSC	0.407995
TCGA-63-A5MV	LUSC	0.527224
TCGA-63-A5MW	LUSC	0.129799
TCGA-66-2734	LUSC	0.88587
TCGA-66-2737	LUSC	0.229292
TCGA-66-2742	LUSC	0.0571358
TCGA-66-2757	LUSC	0.845046
TCGA-66-2770	LUSC	0.239907
TCGA-66-2777	LUSC	0.0280311
TCGA-66-2781	LUSC	0.338517
TCGA-66-2783	LUSC	0.248966
TCGA-66-2785	LUSC	0.0512366
TCGA-66-2791	LUSC	0.316537
TCGA-66-2793	LUSC	0.0308044
TCGA-66-2800	LUSC	0.0518244
TCGA-62-A46P	LUAD	0.13678
TCGA-55-A494	LUAD	0.0482823
TCGA-05-4396	LUAD	0.118303
TCGA-55-6712	LUAD	0.473692
TCGA-05-4410	LUAD	0.428618
TCGA-77-6843	LUSC	0.229737
TCGA-77-7465	LUSC	0.320533
TCGA-77-A5FZ	LUSC	0.787123
TCGA-77-A5GB	LUSC	0.500552
TCGA-05-4425	LUAD	0.228394
TCGA-05-4384	LUAD	0.199447
TCGA-85-6561	LUSC	0.452135
TCGA-85-8071	LUSC	0.0984414
TCGA-85-8072	LUSC	0.245363
TCGA-85-8350	LUSC	0.317276
TCGA-85-A4CL	LUSC	0.303433
TCGA-85-A50Z	LUSC	0.538444
TCGA-85-A510	LUSC	0.306961
TCGA-05-5423	LUAD	0.219622
TCGA-05-5715	LUAD	0.147922
TCGA-05-5429	LUAD	0.140228
TCGA-94-7033	LUSC	0.358893
TCGA-05-4390	LUAD	0.189849
TCGA-05-5428	LUAD	0.196731
TCGA-98-A53B	LUSC	0.352352
TCGA-05-5425	LUAD	0.381745
TCGA-NC-A5HH	LUSC	0.183443
TCGA-NC-A5HT	LUSC	0.0990289
TCGA-44-7661	LUAD	0.387882

## Sheet: Table S3
Table S3: LUAD GSEA output for immune signatures
ComparisonSet	pathway	padj	NES	size	leadingEdge	Significant
Mt.TP53.male-Wt.TP53.male	Macrophages.Monocytes	0.00105686	2.39388	103	c("FCGR3A", "FCGR1A", "TNFSF13B", "LILRB4", "CD8A", "FCER1G", "FCGR2A", "CD86", "CCL5", "CYBB", "SAMSN1", "CD163", "HCK", "FCGR2B", "SLC1A3", "VSIG4", "ITGB2", "CSF1R", "FGL2", "LAPTM5", "CCL2", "PLEK", "SAMHD1", "CTSC", "LHFPL2", "C3AR1", "LAIR1", "NCF2", "LCP2", "APOE", "CORO1A", "LCP1", "MNDA", "CD84", "CD53", "CPVL", "IL18", "C1orf54", "CD33", "NCKAP1L", "LST1", "CASP1", "PTPRC", "APOC1", "GP…	TRUE
Mt.TP53.male-Wt.TP53.male	Lymphocyte.Infiltration	0.0213675	1.62026	13	c("CD8A", "CCL5", "CD14", "CD3D", "LCK", "CD3G", "CD3E")	TRUE
Mt.TP53.male-Wt.TP53.male	TGF.B	0.282809	1.07326	77	c("ITGB8", "RND3", "EPHB2", "FN1", "TNC", "ITGB2", "ICAM1", "SERPINE1", "ITGA5", "NOTCH2", "SMO", "COL6A1", "MMP11", "MMP14", "MMP1", "ADAM9", "FGD1", "IGFBP3", "PAK2", "MARCKSL1", "DVL3", "ZYX", "COL3A1", "THBS2", "TIMP1")	FALSE
Mt.TP53.male-Wt.TP53.male	IFN.G	0.00105686	2.32751	23	c("CXCL10", "IFI44L", "IFI44", "TAP1", "HERC5", "STAT1", "ISG15", "IFIT1", "RSAD2", "IFIH1", "MX1", "IFI6", "SAMD9", "IFIT3", "IFIT2", "DDX60", "DDX58", "RTP4", "OAS3", "OASL")	TRUE
Mt.TP53.male-Wt.TP53.male	Wound.Healing	0.00105686	2.51456	193	c("MYBL2", "MET", "SKA1", "BRIP1", "POLE2", "CHEK1", "CENPW", "WDHD1", "SLC16A1", "PLK4", "GGH", "PLOD2", "MYBL1", "CDCA4", "BRCA2", "EIF4EBP1", "DCBLD2", "CENPN", "PHF19", "MCM7", "TNFRSF12A", "SKA2", "NCEH1", "CENPO", "TUBG1", "SMC2", "NUDT1", "DCLRE1B", "FBXO41", "CCT5", "PGM2", "LMNB2", "LRRC40", "CDK2", "MTHFD1", "STK17A", "MCM3", "ENO1", "RPP40", "PPIH", "H2AFZ", "LOXL2", "NRIP3", "RFC3", "…	TRUE
Mt.TP53.female-Wt.TP53.female	Macrophages.Monocytes	0.445064	-1.00097	103	c("NPC2", "CD52", "HLA-DRB1", "LY86", "DAPK1", "LST1", "ADCY7", "TLR2", "TBXAS1", "FLI1", "HLA-DMA", "EVI2A", "CD48", "ARHGAP15", "VSIG4", "BTK", "CCRL2", "GNPTAB", "ARRB2", "RASSF2", "CORO1A", "CD33", "SELPLG", "EVI2B", "IKZF1", "MSN", "LYZ", "FGR", "CXCR4")	FALSE
Mt.TP53.female-Wt.TP53.female	Lymphocyte.Infiltration	0.0225286	-1.59568	13	c("CD79A", "CD79B", "MS4A1", "CD19", "LTB", "CD37", "CD3D")	TRUE
Mt.TP53.female-Wt.TP53.female	TGF.B	0.00127975	1.67459	77	c("ITGB8", "EPHB2", "TNC", "RND3", "DSP", "DVL3", "MMP14", "MARCKSL1", "COL3A1", "FN1", "PLAT", "PAK2", "SMO", "THBS2", "IGF2R", "PAK1", "NOTCH2", "ADAM9", "ITGB3", "RAC1", "SERPINE1", "MMP11", "NID1", "COL1A2", "COL6A3", "ITGA5", "MTA1", "JUP")	TRUE
Mt.TP53.female-Wt.TP53.female	IFN.G	0.000755972	2.30776	23	c("CXCL10", "IFI44L", "RSAD2", "ISG15", "IFI44", "IFIT2", "SAMD9", "OAS3", "STAT1", "IFI6", "RTP4", "MX1", "OAS2", "IFIT3", "TAP1", "HERC5", "IFIH1", "IFIT1", "OASL", "DDX58", "DDX60")	TRUE
Mt.TP53.female-Wt.TP53.female	Wound.Healing	0.000755972	2.07956	193	c("MYBL2", "BRIP1", "WDHD1", "SKA1", "POLE2", "PLK4", "CENPW", "CHEK1", "BRCA2", "PLOD2", "LMNB2", "CENPN", "CENPO", "SMC2", "EIF4EBP1", "CDCA4", "SLC16A1", "NRIP3", "DCLRE1B", "CCT5", "SPAG17", "NCEH1", "PSMD2", "MCM7", "SKA2", "TUBG1", "DCBLD2", "MET", "NUDT1", "CBX1", "ACTL6A", "MYBL1", "PHF19", "RFC3", "ZWILCH", "EIF4G1", "MTHFD1", "PSMD12", "ENO1", "GGH", "MCM3", "CDK2", "SNRPA1", "H2AFZ", "…	TRUE
Mt.TP53.female-Mt.TP53.male	Macrophages.Monocytes	0.959964	0.844197	103	c("OSBPL3", "TLR2", "IL7R", "RUNX3", "TNFAIP3", "MSN", "CXCR4", "PIK3CG", "GPNMB", "HLA-DMA", "FCGR2B", "FCGR2A", "ITGB2", "SP140", "LCP1", "RASSF2", "SYK", "NPC2", "SAMHD1", "IFI16", "SH2B3", "EVI2B")	FALSE
Mt.TP53.female-Mt.TP53.male	Lymphocyte.Infiltration	0.975088	-0.561616	13	c("CD8A", "CD14", "CD3D")	FALSE
Mt.TP53.female-Mt.TP53.male	TGF.B	0.0459399	1.45154	77	c("CD59", "EPHB3", "RHOB", "PLAT", "TNC", "LRRC17", "HSPG2", "IGF2R", "ICAM1", "EPHA2", "JUP", "COL16A1", "ITGB3", "MMP17", "CTNNB1", "CDH6", "ARHGAP1", "EPHB2", "DVL3", "NEO1", "ITGB8", "SMO", "MMP2", "ITGB2", "PXN", "EPHB4", "TCF7L2", "LRP1")	TRUE
Mt.TP53.female-Mt.TP53.male	IFN.G	0.621042	1.08328	23	c("OAS2", "OAS3", "MX1", "IFIT2", "IFIH1", "RSAD2", "DDX58", "SAMD9", "RTP4", "ISG15", "HERC5", "IFI27")	FALSE
Mt.TP53.female-Mt.TP53.male	Wound.Healing	0.00598086	-2.24902	193	c("GGH", "SKA1", "MYBL1", "C19orf48", "CHEK1", "POLE2", "MCM7", "HAUS1", "H2AFZ", "SNRPD1", "LRRC40", "NME1", "PAICS", "FARSB", "SNRPB", "SNRPE", "SRM", "DHFR", "MRPL37", "MRTO4", "MYBL2", "CDCA4", "CENPW", "MRPS16", "PPIH", "PFKP", "MRPS28", "LYAR", "WDHD1", "SMS", "PLK4", "ID2", "RFC3", "NUP85", "BRIP1", "PFN1", "EBNA1BP2", "EIF4EBP1", "ZWILCH", "COPS6", "TUBG1", "SNRPA", "CENPO", "GSTCD", "PA2…	TRUE
Wt.TP53.female-Wt.TP53.male	Macrophages.Monocytes	0.000891424	2.28955	103	c("HLA-DRB1", "TLR2", "LST1", "CD48", "FCGR2A", "CD33", "CD52", "NPC2", "EVI2A", "CORO1A", "FCGR2B", "SELL", "TNFSF13B", "MNDA", "CYBB", "CCL5", "BTK", "IFI16", "CD8A", "PLEK", "HCK", "CPVL", "HLA-DMA", "FGL2", "CD53", "VSIG4", "CD86", "LYZ", "IL7R", "EVI2B", "SAMSN1", "LCP1", "ALOX5AP", "RUNX3", "SLC1A3", "IKZF1", "LRMP", "CASP1", "LCP2", "LY86", "FCGR1A", "PIK3CG", "PTPRC", "NCKAP1L", "FCER1G",…	TRUE
Wt.TP53.female-Wt.TP53.male	Lymphocyte.Infiltration	0.00422615	1.705	13	c("CD3D", "CD79B", "MS4A1", "CCL5", "CD8A", "CD19", "CD37", "CD3G", "CD3E", "LTB", "LCK", "CD79A", "CD14")	TRUE
Wt.TP53.female-Wt.TP53.male	TGF.B	0.844716	-0.898312	77	c("IGFBP2", "DSP", "JUP", "MARCKSL1", "CTNNA1", "CDH6", "TNFRSF1A", "SEMA3F", "DVL3", "PAK1", "NEO1", "MTA1")	FALSE
Wt.TP53.female-Wt.TP53.male	IFN.G	0.00930579	1.65516	23	c("HERC5", "IFIT1", "IFI44", "MX1", "IFI44L", "CXCL10", "ISG15", "IFIH1", "RSAD2", "TAP1", "IFIT3", "DDX60", "DDX58", "IFI6", "IFI27", "STAT1", "RTP4", "IFIT2", "OAS2", "OASL")	TRUE
Wt.TP53.female-Wt.TP53.male	Wound.Healing	0.97924	-0.79787	193	c("SPAG17", "C19orf48", "F3", "VDAC1", "EIF4G1", "PITPNC1", "NUDT15", "ZWILCH", "KRR1", "TPI1", "FLNC", "SKA1", "MYBL2", "DBNDD1", "WDHD1", "ITGA6", "MKKS", "ERLIN1", "H2AFZ", "PLOD2", "SNRPA1", "CENPJ", "IPO4", "NCLN", "LMNB2", "RFC3", "POLE2", "WDR77", "HNRNPA2B1", "PDIA4", "GGH", "PSMA7", "MCM7", "PSMD2", "BRIP1", "MNAT1", "PLK4", "HNRNPR", "SNRPB", "CHEK1", "SPRYD7")	FALSE
Tumor.female-Tumor.male	Macrophages.Monocytes	0.00065028	1.9515	103	c("TLR2", "IL7R", "FCGR2A", "HLA-DRB1", "FCGR2B", "PIK3CG", "RUNX3", "NPC2", "CPVL", "LCP1", "CD48", "HLA-DMA", "ALOX5AP", "MSN", "ITGB2", "SELL", "TNFAIP3", "LRMP", "CD33", "EVI2B", "NCF2", "RASSF2", "SLC1A3", "CASP1", "IFI16", "BTK", "PLEK", "CYBB", "CD84", "SAMHD1", "CORO1A", "IKZF1", "LST1", "EVI2A", "CD53", "CD52", "MNDA", "NCKAP1L", "OSBPL3", "CCL2", "CD86", "SAMSN1", "TNFSF13B", "SP140", "…	TRUE
Tumor.female-Tumor.male	Lymphocyte.Infiltration	0.0432605	1.46109	13	c("LTB", "MS4A1", "CD79B", "CD37", "CD19", "CD3E", "CD3D", "CD79A", "CCL5", "LCK", "CD3G")	TRUE
Tumor.female-Tumor.male	TGF.B	0.142489	1.22252	77	c("ICAM1", "PLAT", "CD59", "CD44", "TNC", "ITGB2", "ITGB8", "COL8A1", "EPHB3", "LRRC17", "FN1", "SMO", "EPHA2", "MMP1", "MMP2", "ITGB3", "CTNNB1", "HSPG2", "IGFBP4", "ITGA4", "NOTCH2", "ITGA3", "MMP17", "ZYX", "THBS1", "IGF2R", "COL16A1", "SPARC")	FALSE
Tumor.female-Tumor.male	IFN.G	0.0199803	1.56209	23	c("MX1", "HERC5", "IFIT1", "IFI44L", "IFIH1", "RSAD2", "ISG15", "IFIT2", "IFI44", "IFIT3", "CXCL10", "OAS2", "DDX58", "IFI6", "IFI27", "DDX60", "SAMD9", "RTP4")	TRUE
Tumor.female-Tumor.male	Wound.Healing	0.00158128	-1.782	193	c("GGH", "C19orf48", "SKA1", "POLE2", "H2AFZ", "F3", "MCM7", "MYBL2", "CHEK1", "SNRPB", "SNRPD1", "ZWILCH", "MYBL1", "PFKP", "PAICS", "SNRPA1", "MKKS", "VDAC1", "WDHD1", "RFC3", "TPI1", "NME1", "MRPS16", "PITPNC1", "PLK4", "MRPS28", "CENPO", "COQ2", "NOP16", "SNRPA", "CENPW", "RUVBL1", "KRR1", "DBNDD1", "FARSB", "MRPL37", "DHFR", "MAGOHB", "BRIP1", "BCCIP", "DUT", "MNAT1", "SRM", "EIF4EBP1", "PA2…	TRUE
Mt.TP53-Wt.TP53	Macrophages.Monocytes	0.0300766	1.36562	103	c("LILRB4", "FCGR3A", "TNFSF13B", "SAMHD1", "FCGR1A", "CTSC", "FCGR2A", "GPNMB", "CD86", "LHFPL2", "SLC1A3", "FCER1G", "CCL5", "CCL2", "CD8A", "FCGR2B", "NCF2", "APOE", "SAMSN1", "CYBB", "ITGB2", "TNFAIP3", "OSBPL3", "CD163", "LAPTM5", "CD84", "HCK", "RASSF4", "RUNX3", "LCP1", "CSF1R", "LAIR1", "LCP2", "PLEK", "C3AR1", "IL18", "IFI16", "CPVL", "FNBP1", "SLC7A7", "FGL2", "CASP1", "SH2B3")	TRUE
Mt.TP53-Wt.TP53	Lymphocyte.Infiltration	0.496407	-0.982257	13	c("CD79A", "MS4A1", "CD79B", "LTB", "CD19")	FALSE
Mt.TP53-Wt.TP53	TGF.B	0.00164042	1.65522	77	c("ITGB8", "EPHB2", "TNC", "RND3", "FN1", "SMO", "MMP11", "COL3A1", "MMP14", "SERPINE1", "THBS2", "DVL3", "MARCKSL1", "NOTCH2", "DSP", "PAK2", "ADAM9", "ITGA5", "IGFBP3", "PLAT", "ICAM1", "RAC1", "FGD1", "COL1A2", "ITGB2", "PAK1", "COL6A1", "ZYX", "LAMB1", "COL6A3", "IGF2R", "MTA1", "EPHB4")	TRUE
Mt.TP53-Wt.TP53	IFN.G	0.00121714	2.49677	23	c("CXCL10", "IFI44L", "IFI44", "ISG15", "STAT1", "TAP1", "RSAD2", "HERC5", "IFIT1", "SAMD9", "IFI6", "IFIT2", "MX1", "IFIH1", "OAS3", "IFIT3", "OASL", "RTP4", "DDX58", "DDX60", "OAS2")	TRUE
Mt.TP53-Wt.TP53	Wound.Healing	0.00121714	2.49281	193	c("MYBL2", "BRIP1", "SKA1", "WDHD1", "POLE2", "CHEK1", "CENPW", "PLK4", "MET", "SLC16A1", "BRCA2", "PLOD2", "GGH", "CDCA4", "MYBL1", "EIF4EBP1", "CENPN", "MCM7", "DCBLD2", "CENPO", "LMNB2", "SMC2", "CCT5", "NCEH1", "DCLRE1B", "SKA2", "TUBG1", "NUDT1", "PHF19", "NRIP3", "PSMD2", "PGM2", "ENO1", "LOXL2", "RFC3", "MTHFD1", "ACTL6A", "MCM3", "TNFRSF12A", "CDK2", "RPP40", "FBXO41", "STK17A", "ZWILCH",…	TRUE
Wt.TP53.female-Wt.TP53.male	M1.Macrophages	0.000679925	2.03845	186	c("TSIX", "S100B", "SUSD3", "CD48", "CD200R1", "C11orf21", "CCR7", "TRIM69", "HLA-B", "SPON1", "HCP5", "LRRC8C", "IL27RA", "GIMAP2", "NOG", "ATP8B2", "SMURF2", "UPP1", "ANK3", "BTN3A3", "LTA", "FBLN7", "PYHIN1", "SLA2", "NFKBIA", "S100A6", "GYPC", "IFIH1", "RASSF2", "LRRN3", "PAG1", "PLEKHA2", "LDLRAP1", "CFP", "RSAD2", "NPAS2", "KIAA0391", "TMEM128", "RPS15A", "FUCA1", "PLEKHO1", "CD27", "MFNG",…	TRUE
Wt.TP53.female-Wt.TP53.male	M2.Macrophages	0.487782	-1.09199	136	c("TFF3", "SLC7A11", "AKR1C3", "RAPGEFL1", "SMPD3", "ECT2", "ITPRID2", "SEC14L4", "CDK6", "PKN2", "MARCKSL1", "PDE10A", "DBN1", "GALNT7", "TNFRSF21", "ANP32A", "TSPAN11", "SLC44A5", "SOX4", "NEIL3", "CDC25A", "HMGB3", "GGA1", "NEK2", "GJC1", "COL7A1", "CCNJ", "IFT81", "GPR4", "KIF20B")	FALSE

## Sheet: Table S4
Table S4: Immune signature gene sets
Macrophages-Monocytes	Lymphocyte-Infiltration	TGF-B	IFN-G	Wound.Healing
TNFRSF1B	CCL5	MMP3	IFI44	ACTL6A
TLR2	CD14	MARCKSL1	IFI44L	ADAMTS1
SYK	CD19	IGF2R	DDX58	AIMP2
PTPRC	CD247	SMO	IFIT3	BRCA2
SLC7A7	CD37	LAMB1	IFI6	ALKBH7
SAMSN1	CD3D	SPARC	IFI27	APITD1
RUNX3	CD3E	FN1	IFIT2	APOO
RASSF2	CD3G	ITGA4	IFIT1	BCCIP
PSCDBP	CD79A	MMP19	CXCL10	BRIP1
PLCG2	CD79B	ITGB8	MX1	C11orf24
NCF2	CD8A	ITGA5	OAS1	C12orf24
LYN	CD8B	NID1	OAS2	C13orf27
LHFPL2	IGHG3	TIMP1	OAS3	C16orf61
LCP2	JCHAIN	SEMA3F	HERC5	C19orf48
LCP1	IGLC1	RHOQ	SAMD9	C3orf26
LAPTM5	LCK	CTNNB1	HERC6	CBX1
ITGB2	LTB	MMP2	DDX60	CCBL2
IL10RA	MS4A1	SERPINE1	RTP4	CCT5
IFI30		EPHB2	IFIH1	CDCA4
IFI16		COL16A1	STAT1	CDK2
HLA-DRB1		EPHA2	TAP1	CENPJ
HLA-DMA		TNC	OASL	CENPN
HCK		JUP	RSAD2	CENPO
FGL2		ITGA3	ISG15	CENPW
FCGR3A		TCF7L2		CEP78
FCGR2B		COL3A1		CHEK1
EVI2B		CDH6		CKLF
DAPK1		WNT2B		COPS6
CUGBP2		ADAM9		COQ2
CTSS		DSP		CORO1C
CTSL		HSPG2		COTL1
CTSC		ARHGAP1		COX17
CSF1R		ITGB5		CPEB4
CORO1A		IGFBP5		DBNDD1
CD86		ARHGDIA		DCBLD2
CD53		LRP1		DCK
CD48		IGFBP2		DCLRE1B
CD163		CTNNA1		DHFR
APOE		LRRC17		DLEU1
APOC1		MMP14		DLEU2
ALOX5AP		NEO1		DUT
SLC1A3		EFNA5		DYNLT1
PLEK		ITGB3		EBNA1BP2
MYO1F		EPHB3		EIF2AK1
IL7R		CD44		EIF4EBP1
HCLS1		IGFBP4		EIF4G1
FCGR1A		TNFRSF1A		EMP2
CXCR4		RAC1		ENO1
CPVL		PXN		ERLIN1
BTK		PLAT		EXOSC8
ADCY7		COL8A1		EZR
TNFAIP3		WNT8B		F3
SP140		IGFBP3		FAM167A
SELPLG		RHOA		FAM89B
SELL		EPHB4		FARSA
RNASE6		MMP1		FARSB
PIK3CG		PAK1		FBXO41
MSN		MTA1		FLNC
MPP1		THBS2		GGH
MERTK		CSPG2		GLRX3
LRMP		MMP17		GNG11
LILRB4		CD59		GPLD1
LAIR1		DVL3		GSTCD
IL18		RHOB		H2AFZ
GPNMB		COL6A3		HAS2
FYB		NOTCH2		HAUS1
FPRL2		BSG		HMGN2
FCGR2A		MMP11		HN1L
FCER1G		COL1A2		HNRNPA2B1
EVI2A		ZYX		HNRNPR
CYBB		RND3		HSPB11
CECR1		THBS1		HYLS1
CD8A		RHOG		ID2
CD84		ICAM1		ID3
CD33		LAMA4		IFRD2
CASP1		DVL1		IL7R
C3AR1		PAK2		IMP4
B2M		ITGB2		IPO4
ARRB2		COL6A1		ITGA6
AMPD3		FGD1		JUNB
VSIG4				KIAA0090
TNFSF13B				KRR1
RASSF4				LMNB2
NPL				LOXL2
LY86				LRRC40
LST1				LSM3
GIMAP4				LSM4
CCRL2				LYAR
CCL5				MAGOHB
CCL2				MAP3K8
TBXAS1				MAPRE1
SAMHD1				MARVELD2
OSBPL3				MCM3
NPC2				MCM7
MNDA				MCTS1
FLI1				MET
FGR				MFSD11
DOCK2				MKKS
CD97				MLF1IP
WIPF1				MNAT1
SH2B3				MRPL12
NCKAP1L				MRPL37
LYZ				MRPS16
IKZF1				MRPS28
HMHA1				MRTO4
GNPTAB				MSN
FNBP1				MT1F
FMNL1				MT3
CD52				MTHFD1
C1orf54				MYBL1
C13orf18				MYBL2
ARHGAP15				MYCBP
				MYL6
				NCEH1
				NCLN
				NLN
				NME1
				NOP16
				NRIP3
				NUDT1
				NUDT15
				NUP107
				NUP35
				NUP85
				NUP93
				NUPL1
				NUTF2
				PA2G4
				PAICS
				PDAP1
				PDIA4
				PDLIM7
				PFKP
				PFN1
				PGM2
				PHF19
				PITPNC1
				PLAUR
				PLG
				PLK4
				PLOD2
				PNN
				PNO1
				POLE2
				POLR3K
				PPIH
				PSMA7
				PSMC3
				PSMD12
				PSMD14
				PSMD2
				PTPLB
				RAB3B
				RBM14
				RFC3
				RGS8
				RHOC
				RMND5B
				RNF138
				RNF41
				RPN1
				RPP40
				RUVBL1
				SAR1A
				SAR1B
				SDC1
				SH3BP5L
				SKA1
				SKA2
				SLC16A1
				SLC25A40
				SLC25A5
				SMC2
				SMS
				SMURF2
				SNRPA
				SNRPA1
				SNRPB
				SNRPC
				SNRPD1
				SNRPE
				SNX17
				SPAG17
				SPRYD7
				SRM
				STK17A
				STRA13
				TAGLN
				TCEB1
				TMEM130
				TNFRSF12A
				TOMM40
				TPI1
				TPM1
				TPM2
				TPM3
				TPRKB
				TRA2B
				TUBA4A
				TUBG1
				UAP1
				UBE2J1
				UMPS
				UQCR10
				USPL1
				VDAC1
				VTA1
				WDHD1
				WDR54
				WDR77
				WSB2
				ZWILCH

## Sheet: Table S5
Table S5: M1 and M2 Macrophages gene signatures
M1 Macrophages	M2 Macrophages
AC004086.1	AC005747.1
AC004151.1	AC027237.1
AC124319.1	AC097381.1
ACAA1	ADAMTS1
ADAMTS6	ADGRB2
ADD3	AEBP1
ANK3	AKR1C3
ANXA6	ALDH2
AP3M2	ANKRD20A11P
APOL3	ANKRD36BP2
APRT	ANOS1
AREL1	ANP32A
ARID5A	ATP6AP1L
ATP10A	BATF3
ATP8B2	BCL11B
AUTS2	CALHM5
BAG3	CAPSL
BIN1	CBX5
BMS1	CCDC144A
BTG1	CCDC83
BTN3A3	CCNJ
C11orf21	CD1D
C17orf49	CD300A
CAPN2	CD79B
CBLB	CDC25A
CCR7	CDK6
CD200R1	CDSN
CD27	CENPV
CD48	CEP97
CD55	CFAP74
CEPT1	CHD9
CERS2	CHRNA3
CFP	CHRNA4
CIB1	CHSY1
CNIH4	CMC2
CNOT11	COL6A3
COL1A2	COL7A1
COTL1	CORIN
COX7C	CRNDE
CTSL	CTTN
CTSZ	CUBN
DEF8	CYP2F1
DOCK9	DBN1
DPH5	DDX3Y
E4F1	DDX5
EEF1G	DEPDC7
EEF2	DLAT
EIF3F	DNAJC9
EIF3K	DST
EIF4E2	ECT2
ELMO1	EIF1AY
EPB41	ELAVL4
EPSTI1	EPB41L2
ERAP2	EPM2AIP1
ERMAP	ETV5
ESYT1	EVC2
FBLN7	FAM118A
FBXO34	FAM71B
FLNA	FBLL1
FOXO1	FCGR2C
FOXP1	FZD1
FUCA1	GALNT2
FXN	GALNT7
FYB1	GGA1
GBP4	GJC1
GGT1	GLI4
GIMAP2	GLIPR1L1
GIMAP8	GNA15
GMPPA	GNAQ
GNL3	GOT1L1
GPA33	GPR4
GPR155	GPRIN1
GYPC	GXYLT2
HCFC2	H2BFM
HCP5	H3F3B
HEBP1	HHIP
HLA-B	HMGB3
HLA-G	HNRNPA2B1
HLA-J	HNRNPK
IFIH1	HOXA10
IKZF4	HOXA7
IL12RB1	HOXA9
IL27RA	HPSE2
IL4R	HTR2A
IMPACT	IFT81
INPP4B	IL4
KDM7A	INHBC
KIAA0391	INPP5B
KIAA0513	ITIH3
KISS1R	ITPRID2
LAMP3	KDM5D
LDLRAP1	KIAA1217
LFNG	KIF20B
LIPA	KIR2DL4
LITAF	KMT2A
LPIN1	KRTAP5-2
LPIN2	LAPTM4A
LRIG1	LDLRAD3
LRRC8C	LILRA5
LRRC8D	LINC00205
LRRN3	LINC00992
LTA	LINC01225
MAF	LINC01558
MFNG	LINC01686
MGAT1	LMO2
MLLT3	LRRN1
MPP7	LRRN4
MPZL3	LYST
NELL2	MARCKSL1
NFKBIA	MBD6
NKIRAS1	MDM4
NMRK1	MELTF
NOG	MSI2
NOP53	NEIL3
NPAS2	NEK2
P4HA1	OPRPN
PABPC1	OR2F1
PAG1	OSBPL5
PANK4	PALLD
PARP11	PCGF5
PDE4B	PCMT1
PFDN5	PDE10A
PGAP1	PDZD9
PLAC8	PELI2
PLEKHA2	PHACTR1
PLEKHO1	PHLPP1
PNP	PKN2
POLR3E	PLCH1
PSME2	POMP
PUS1	POU3F4
PYHIN1	PPEF1
RASA3	PPM1D
RASSF2	PRKY
RGS1	PTGDR2
RGS16	PTGS1
RGS19	QSER1
RIMS4	R3HDM2
RLN1	RAPGEFL1
RPL12	RGMA
RPL13	RNFT2
RPL13A	RPS4Y1
RPL17	RTN4
RPL29	RUBCNL
RPL30	RUFY2
RPL31	SEC14L4
RPL32	SEM1
RPL7A	SERTAD4-AS1
RPL9	SH2D1A
RPLP1	SIGLEC9
RPLP2	SLC22A18AS
RPS10	SLC22A7
RPS15A	SLC44A5
RPS18	SLC7A11
RPS19	SLC7A3
RPS6KA3	SMPD3
RSAD2	SORT1
S100A6	SOX4
S100B	SP4
S1PR1	SPCS2
SAMHD1	SPRED2
SEMA3A	SSSCA1-AS1
SEMA4C	STS
SFMBT2	SYCE1
SLA2	TCF7
SMIM20	TFF3
SMURF2	TFPI
SNHG8	TIMM23B
SPATA13	TNFRSF21
SPIN3	TRDMT1
SPON1	TSPAN11
SQOR	TSPYL4
STIM2	TTTY10
SUSD3	TXLNGY
TES	UBASH3B
TLK1	UBE2J1
TMEM128	USP9Y
TOMM5	WDR63
TPP2	WFDC3
TRIM69	XCL1
TRMT10C	YWHAQ
TSIX	ZBTB12
TSPAN14	ZBTB44
TUBA4A	ZNF169
TXK	ZNF257
UBALD2	ZNF736
UPP1	ZSCAN16-AS1
XIST
YTHDC2
ZFAND6
ZNF16
ZNF229
ZNF302
ZNF883
ZNFX1

## Sheet: Table S6
Table S6: M1 Macrophage genes - LUAD Differential Expression output for Wt-TP53 female vs. Wt-TP53 males
Gene symbol	Chromosome	logFC	-log(p)	adj.P.Val
TSIX	X	4.77546	38.8606	1.37859e-39
SUSD3	9	0.56478	1.85969	0.0138138
CD48	1	0.550306	1.1485	0.0710398
BMS1	10	-0.178153	1.00324	0.0992559
LRRC8C	1	0.331555	1.00263	0.0993958
CD200R1	3	0.487271	0.977945	0.10521
C11orf21	11	0.483442	0.972367	0.106569
SMURF2	17	0.284797	0.97112	0.106876
MLLT3	9	-0.374153	0.956015	0.110658
TRIM69	15	0.410185	0.937431	0.115496
HLA-B	6	0.400953	0.9366	0.115718
S100B	21	0.69075	0.924667	0.118941
IL27RA	19	0.339571	0.872136	0.134235
TMEM128	4	0.183079	0.862762	0.137163
HCP5	6	0.388609	0.8316	0.147367
PUS1	12	-0.273597	0.819693	0.151463
CCR7	17	0.482478	0.802546	0.157563
ATP8B2	1	0.324673	0.781684	0.165316
LDLRAP1	1	0.210491	0.75195	0.177031
BTN3A3	6	0.292223	0.748105	0.178606
GIMAP2	7	0.33709	0.746306	0.179347
SPON1	11	0.423676	0.736299	0.183527
UPP1	7	0.318306	0.691602	0.203422
ZNF302	19	0.176162	0.690539	0.203921
ESYT1	12	0.153537	0.687292	0.205451
KIAA0391	14	0.205515	0.646392	0.22574
NFKBIA	14	0.262243	0.645855	0.226019
PLEKHA2	8	0.22819	0.640707	0.228714
BTG1	12	-0.231375	0.616394	0.241884
GYPC	2	0.259876	0.595369	0.253881
IFIH1	2	0.256515	0.591615	0.256086
AREL1	14	-0.131913	0.591116	0.25638
PFDN5	12	0.197374	0.549558	0.282125
FUCA1	1	0.212094	0.547456	0.283494
RPS15A	16	0.214245	0.546479	0.284133
RASSF2	20	0.268933	0.536364	0.290828
CAPN2	1	0.187451	0.534053	0.29238
ANK3	10	0.360596	0.527454	0.296856
MFNG	22	0.206501	0.520959	0.301329
SLA2	20	0.301876	0.516772	0.304248
PLEKHO1	1	0.215167	0.51473	0.305682
FOXP1	3	-0.143766	0.505498	0.31225
LTA	6	0.347092	0.493665	0.320874
TSPAN14	10	-0.117959	0.492622	0.321646
NOG	17	0.402205	0.489601	0.323891
FBLN7	2	0.351289	0.480045	0.331097
PAG1	8	0.26663	0.473128	0.336412
S100A6	1	0.301403	0.467946	0.340451
NKIRAS1	3	0.141026	0.451387	0.353682
EIF3K	19	0.139372	0.434507	0.367699
PYHIN1	1	0.336532	0.428545	0.372782
RPS18	6	0.228596	0.421243	0.379103
MPZL3	11	0.226944	0.419688	0.380462
CNIH4	1	0.176176	0.419022	0.381046
INPP4B	4	-0.323249	0.406673	0.392037
RSAD2	2	0.279684	0.394467	0.403212
RGS19	20	0.147726	0.388195	0.409077
CFP	X	0.289061	0.376238	0.420496
LRRN3	7	0.319926	0.373158	0.423488
ANXA6	5	0.145385	0.360553	0.435961
NPAS2	2	0.285215	0.35752	0.439016
ARID5A	2	0.149493	0.354808	0.441766
SAMHD1	20	0.244614	0.354049	0.442538
PSME2	14	0.139333	0.345012	0.451843
APOL3	22	0.217602	0.33675	0.460522
CD27	12	0.285493	0.320894	0.477646
POLR3E	16	-0.0979372	0.313226	0.486154
RPL30	8	0.143494	0.305425	0.494965
FYB1	5	0.249649	0.302442	0.498376
RPL32	3	0.138489	0.291852	0.510679
RPS6KA3	X	0.125088	0.282089	0.52229
ACAA1	3	-0.109102	0.279267	0.525694
PDE4B	1	0.179075	0.273638	0.532552
EIF4E2	2	0.0704699	0.272179	0.534344
GNL3	3	-0.104146	0.258833	0.551019
IL12RB1	19	0.208478	0.253918	0.557291
ATP10A	15	0.215793	0.247979	0.564964
LIPA	10	0.155255	0.242818	0.571718
SPIN3	X	0.119842	0.233464	0.584165
GGT1	22	-0.216198	0.231519	0.586788
RPS10	6	0.134795	0.226935	0.593014
AUTS2	7	0.197245	0.222755	0.598749
TXK	4	0.176446	0.210379	0.616058
E4F1	16	-0.0969288	0.208855	0.618223
CERS2	1	0.0992642	0.208117	0.619274
SEMA3A	7	0.313858	0.202963	0.626667
RPL31	2	0.113925	0.197444	0.634682
LRIG1	3	-0.113989	0.193848	0.639959
GBP4	1	0.186586	0.192889	0.641374
GIMAP8	7	0.143265	0.190653	0.644684
HLA-G	6	0.244555	0.189413	0.646528
LPIN2	18	-0.152963	0.18858	0.647769
RPLP2	11	0.0980417	0.183233	0.655794
BIN1	2	-0.083585	0.180738	0.659572
GPA33	1	0.265599	0.180281	0.660267
PLAC8	4	0.248094	0.172456	0.67227
TUBA4A	2	0.114573	0.170593	0.675161
COTL1	16	0.11873	0.157703	0.6955
EEF1G	11	0.072405	0.151518	0.705476
ERMAP	1	0.0754278	0.148531	0.710344
SEMA4C	2	-0.0804103	0.148087	0.71107
LITAF	16	0.0620771	0.147837	0.71148
FLNA	X	0.104477	0.145571	0.715202
ELMO1	7	-0.117188	0.14479	0.71649
GPR155	2	0.0788156	0.143382	0.718817
ADAMTS6	5	-0.133171	0.141948	0.721194
PNP	14	0.0846526	0.138976	0.726147
LAMP3	3	0.178303	0.138696	0.726614
SFMBT2	10	0.150711	0.137375	0.728827
CBLB	3	-0.0662455	0.136866	0.729682
DOCK9	13	0.0962142	0.136345	0.730559
DPH5	1	0.0692622	0.136345	0.730559
IMPACT	18	0.0585222	0.135528	0.731934
NMRK1	9	0.0699859	0.133354	0.735607
S1PR1	1	0.106794	0.1318	0.738245
SQOR	15	0.0882296	0.124046	0.751543
CTSL	9	-0.108623	0.123659	0.752212
MGAT1	5	-0.0504765	0.113579	0.769877
KIAA0513	16	-0.0807633	0.109483	0.777172
MPP7	10	-0.0867534	0.108973	0.778084
COX7C	5	-0.0644262	0.105301	0.784692
GMPPA	2	-0.0520727	0.100987	0.792524
SPATA13	13	-0.093915	0.0936048	0.806112
RPLP1	15	-0.0623869	0.0932535	0.806764
PGAP1	2	-0.0706236	0.092913	0.807397
SMIM20	4	-0.0523448	0.0923792	0.80839
HCFC2	12	-0.0487093	0.0916816	0.809689
LPIN1	2	0.060142	0.0850108	0.822222
RPL9	4	-0.157709	0.0842037	0.823752
ZNFX1	20	0.0434826	0.0817389	0.82844
IKZF4	12	0.0497527	0.0802063	0.831369
ZNF229	19	-0.131786	0.0768678	0.837784
FBXO34	14	-0.0353381	0.0746641	0.842046
CTSZ	20	-0.0443569	0.0746641	0.842046
EPSTI1	13	0.0842451	0.0732321	0.844827
ADD3	10	-0.0800094	0.0729537	0.845369
PARP11	12	-0.048127	0.0722303	0.846778
CEPT1	1	-0.033663	0.0704302	0.850295
PABPC1	8	-0.0513006	0.0704302	0.850295
STIM2	4	-0.0421929	0.0702032	0.85074
BAG3	10	-0.0393031	0.0662924	0.858435
RASA3	13	0.0543406	0.0592342	0.872501
ZNF16	8	-0.0348366	0.0584649	0.874048
EIF3F	11	0.0263585	0.0564757	0.87806
RPL13	16	0.0451936	0.0560677	0.878885
AP3M2	8	-0.0343695	0.0548529	0.881347
RPL29	3	0.0454366	0.0544526	0.88216
ZFAND6	15	0.0271705	0.0541614	0.882752
LFNG	7	-0.0627255	0.045809	0.899893
RPL13A	19	-0.0381497	0.045703	0.900113
YTHDC2	5	-0.0238643	0.0424102	0.906964
RPL12	9	0.0380383	0.0419213	0.907985
RGS1	1	0.0629018	0.0383582	0.915465
COL1A2	7	-0.0612739	0.0381569	0.91589
FOXO1	13	-0.0377469	0.0369792	0.918376
FXN	9	0.02059	0.0365825	0.919216
MAF	16	-0.0337744	0.0357796	0.920917
KISS1R	19	-0.0818214	0.0330319	0.926762
ERAP2	5	-0.0629826	0.0304656	0.932254
C17orf49	17	-0.0157328	0.0304618	0.932263
TRMT10C	3	0.0196791	0.029917	0.933433
NOP53	19	0.0217871	0.0289028	0.935615
CIB1	15	-0.0224624	0.0283731	0.936757
HEBP1	12	0.018343	0.0279817	0.937602
TES	7	-0.0187057	0.0251554	0.943723
RGS16	1	0.0336704	0.0239852	0.946269
RPL17	18	0.0223274	0.0236551	0.946989
APRT	16	0.0210258	0.0222425	0.950074
KDM7A	7	0.0128471	0.0196861	0.955683
TLK1	2	-0.00946195	0.0187099	0.957834
UBALD2	17	0.0135082	0.0181586	0.95905
RPL7A	9	0.0160776	0.017719	0.960022
CNOT11	2	-0.00912056	0.0147042	0.966709
TPP2	13	0.00839867	0.014451	0.967273
IL4R	16	-0.00958879	0.014451	0.967273
PANK4	1	0.007195	0.0144255	0.96733
LRRC8D	1	0.00790517	0.0135474	0.969288
EEF2	19	-0.0104511	0.0124061	0.971838
EPB41	1	-0.00717383	0.0108667	0.975289
NELL2	12	-0.0102433	0.00358159	0.991787
RIMS4	20	0.00767023	0.00267783	0.993853
P4HA1	10	0.00341915	0.0026433	0.993932
TOMM5	9	-0.00218459	0.00233584	0.994636
CD55	1	0.00372875	0.00211341	0.995146
RPS19	19	0.000801712	0.000636368	0.998536
DEF8	16	-0.000340336	0.000448382	0.998968

## Sheet: Table S7
Table S7: Immunomodulator genes
Gene	Entrez ID	Category	Immune Checkpoint	Function
CD28	940	Co-stimulator	Stimulatory
CD80	941	Co-stimulator	Stimulatory	T cell activation
ICOSLG	23308	Co-stimulator	Stimulatory
BTN3A1	11119	Co-inhibitor	Stimulatory	Activation of γδ T cells
BTN3A2	11118	Co-inhibitor	Stimulatory	Higher expression leads to increased CD4+ infiltration
CD274	29126	Co-inhibitor	Inhibitory
CD276	80381	Co-inhibitor	Inhibitory
PDCD1LG2	80380	Co-inhibitor		Immune suppression
SLAMF7	57823	Co-inhibitor	Inhibitory	Inhibitory
VSIR	64115	Co-inhibitor	Inhibitory
VTCN1	79679	Co-inhibitor	Inhibitory
CCL5	6352	Ligand	Stimulatory
CD40LG	959	Ligand	Stimulatory
CD70	970	Ligand	Stimulatory
CX3CL1	6376	Ligand	Stimulatory
CXCL10	3627	Ligand	Stimulatory
CXCL9	4283	Ligand	Stimulatory
IFNAR1	3439	Ligand	Stimulatory
IFNAR2	3440	Ligand	Stimulatory
IFNGR1	3458	Ligand	Stimulatory
IL10	3586	Ligand	Inhibitory	Anti-inflammatory cytokine
IL12A	3592	Ligand	Stumulatory
IL13	3596	Ligand	Inhibitory	Anti-inflammatory cytokine
IL1A	3552	Ligand	Stimulatory
IL1B	3553	Ligand	Stimulatory
IL2	3558	Ligand	Stimulatory
IL4R	3565	Ligand	Inhibitory	Differentiation of Th0 to Th2
TGFB1	7040	Ligand	Inhibitory	Immune suppression
TNF	7124	Ligand	Stimulatory
TNFSF4	7292	Ligand	Stimulatory
TNFSF9	8744	Ligand	Stimulatory
VEGFA	7422	Ligand	Inhibitory	Immune suppressor
VEGFB	7423	Ligand	Inhibitory	Immune suppressor
ADORA2A	135	Receptor	Inhibitory
BTLA	151888	Receptor	Inhibitory
CD27	939	Receptor	Stimulatory
CD40	958	Receptor	Stimulatory
CTLA4	1493	Receptor	Inhibitory
EDNRB	1910	Receptor	Inhibitory	Suppress T cell adhesion and homing
HAVCR2	84868	Receptor	Inhibitory
ICOS	29851	Receptor	Stimulatory
IL2RA	3559	Receptor	Stimulatory
KIR2DL1	3802	Receptor	Inhibitory
KIR2DL2	3803	Receptor	Inhibitory
KIR2DL3	3804	Receptor	Inhibitory
LAG3	3902	Receptor	Inhibitory
PDCD1	5133	Receptor	Inhibitory
TIGIT	201633	Receptor	Inhibitory
TLR4	7099	Receptor	Stimulatory
TNFRSF14	8764	Receptor	Stimulatory
TNFRSF18	8784	Receptor	Stimulatory
TNFRSF4	7293	Receptor	Stimulatory
TNFRSF9	3604	Receptor	Stimulatory
ICAM1	3383	Cell adhesion	Stimulatory
ITGB2	3689	Cell adhesion	Stimulatory
SELP	6403	Cell adhesion	Stimulatory
HLA-A	3105	Antigen presentation		MHC Class I
HLA-B	3106	Antigen presentation		MHC Class I
HLA-C	3107	Antigen presentation		MHC Class I
HLA-DPA1	3113	Antigen presentation		MHC Class II
HLA-DPB1	3115	Antigen presentation		MHC Class II
HLA-DQA1	3117	Antigen presentation		MHC Class II
HLA-DQA2	3118	Antigen presentation		MHC Class II
HLA-DQB1	3119	Antigen presentation		MHC Class II
HLA-DQB2	3120	Antigen presentation		MHC Class II
HLA-DRA	3122	Antigen presentation		MHC Class II
HLA-DRB1	3123	Antigen presentation		MHC Class II
HLA-DRB3	3125	Antigen presentation		MHC Class II
HLA-DRB4	3126	Antigen presentation		MHC Class II
HLA-DRB5	3127	Antigen presentation		MHC Class II
MICA	100507436	Antigen presentation		Immune suppression
MICB	4277	Antigen presentation		Immune suppression
ARG1	383	Other	Inhibitory	Immune suppression
ENTPD1	953	Other	Stimulatory	Immune suppression
GZMA	3001	Other	Stimulaotry	Granzyme
HMGB1	3146	Other	Stimulatory
IDO1	3620	Other	Inhibitory
PRF1	5551	Other	Stimulatory	Allows infiltration by granzymes

## Sheet: Table S8
Table S8: Immunomodulator genes - LUAD Differential Expression output for Wt-TP53 female vs. Wt-TP53 male
Gene symbol	Chromosome	logFC	adj.P.Val
IFNAR2	21	0.339536	0.0203179
TNF	6	0.756868	0.0213706
HLA-DRB1	6	0.702091	0.0464514
HLA-DRA	6	0.607829	0.0503985
ICAM1	19	0.572562	0.051305
IFNAR1	21	0.198883	0.0540508
HLA-DPA1	6	0.593814	0.0540508
HLA-DQB2	6	0.872916	0.0603758
CD40	20	0.492813	0.0650007
HLA-DRB5	6	0.744715	0.0973489
IFNGR1	6	0.296264	0.10521
HLA-DPB1	6	0.490007	0.1125
MICB	6	0.386414	0.113338
HLA-B	6	0.400953	0.115718
PDCD1	2	0.522133	0.117963
ICOS	2	0.510155	0.118917
HLA-DQB1	6	0.575672	0.148974
TNFRSF9	1	0.571659	0.152163
BTN3A1	6	0.272184	0.152846
CD80	3	0.418388	0.156804
CD40LG	X	0.450739	0.172671
PDCD1LG2	9	0.441211	0.174233
HLA-C	6	0.281072	0.189448
ADORA2A	22	0.250702	0.20777
CCL5	17	0.440474	0.20962
HLA-A	6	0.285427	0.212797
HLA-DQA2	6	0.524515	0.213803
HLA-DQA2	6	0.520546	0.226019
CD276	15	-0.162657	0.231505
VEGFA	6	-0.330046	0.238372
TGFB1	19	0.251319	0.24352
BTN3A2	6	0.269086	0.249906
IL10	1	0.351263	0.253463
GZMA	5	0.421719	0.257076
CD274	9	0.43685	0.264114
TNFSF9	19	0.422975	0.274618
BTLA	3	0.380181	0.276954
CX3CL1	16	0.427521	0.305682
IL12A	3	-0.295861	0.307329
TNFRSF18	1	0.4157	0.308111
CXCL9	4	0.532236	0.311657
CTLA4	2	0.355753	0.320005
VTCN1	1	-0.614622	0.340187
TIGIT	3	0.357668	0.341726
ITGB2	21	0.311098	0.348574
CD28	2	0.286767	0.352933
VSIR	10	0.205406	0.352933
LAG3	12	0.362973	0.354916
CXCL10	4	0.421654	0.392003
HAVCR2	5	0.256677	0.420878
ENTPD1	10	0.130349	0.435961
TLR4	9	0.235177	0.46482
IDO1	8	0.368468	0.468134
IL1B	2	0.262649	0.47399
CD27	12	0.285493	0.477646
PRF1	10	0.25428	0.484271
ICOSLG	21	0.136613	0.566589
SLAMF7	1	0.242596	0.569957
IL1A	2	0.268631	0.581919
TNFRSF14	1	0.130437	0.601345
IL2RA	10	0.188434	0.666799
VEGFB	11	0.0696315	0.681087
SELP	1	0.156121	0.714842
TNFRSF4	1	0.106528	0.762337
EDNRB	13	-0.113022	0.805543
HMGB1	13	-0.0327307	0.841122
IL4R	16	-0.00958879	0.967273
TNFSF4	1	0.0148675	0.976604

## Sheet: Table S9
Table S9: Tumor Inflammation Signature (TIS) genes
Gene
PSMB10
HLA-DQA1
HLA-DRB1
CMKLR1
HLA-E
NKG7
CD8A
CCL5
CXCL9
CD27
CXCR6
IDO1
STAT1
TIGIT
LAG3
CD274
PDCD1LG2
CD276

## Sheet: Table S10
Table S10: Tumor Inflammation Signature(TIS) genes - LUAD Differential Expression output for Wt-TP53 female vs. Wt-TP53 males
Gene symbol	Chromosome	logFC	adj.P.Val
HLA-DRB1	6	0.702091	0.0464514
HLA-E	6	0.267083	0.145837
CXCR6	3	0.39018	0.168793
PDCD1LG2	9	0.441211	0.174233
CCL5	17	0.440474	0.20962
CD276	15	-0.162657	0.231505
CD8A	2	0.4461	0.24352
CD274	9	0.43685	0.264114
CXCL9	4	0.532236	0.311657
TIGIT	3	0.357668	0.341726
LAG3	12	0.362973	0.354916
PSMB10	16	0.168374	0.455059
IDO1	8	0.368468	0.468134
CD27	12	0.285493	0.477646
NKG7	19	0.284988	0.482505
STAT1	2	0.149989	0.569957
CMKLR1	12	0.181048	0.634082

[truncated: 8 more sheets: Table S11, Table S12, Table S13, Table S14, Table S15, Table S16, Table S17, Table S18]
